# Supplementary material for: Global production potential of green methanol based on variable renewable electricity
Source: Royal Society of Chemistry journal article supplement (doi:10.1039/d3ee02951d), 2024-01-01
Supplement: d3ee02951d1.pdf [file d3ee02951d1.pdf]

## Supplementary Information for

### Global production potential of green methanol based on variable renewable electricity

Mahdi Fasihi \*, Christian Breyer

LUT University, Yliopistonkatu 34, 53850 Lappeenranta, Finland

\* Corresponding author: mahdi.fasihi@lut.fi

Energy & Environmental Science (2024)

DOI: <https://doi.org/10.1039/d3ee02951d>

## Table of Content

---

- S1. Full Load hours and levelised cost of PV and wind power plants
  - S2. Optimal technology mix and operational behaviour
  - S3. Levelised cost of methanol with customised colour bar range based on low-cost regions
  - S4. Energetic cost comparison of e-methanol and e-ammonia as fuel
  - S5. Cost benefits of integrated Power-to-Methanol-Ammonia plants
  - S6. Sensitivity Analyses
  - S7. Cost projection of alkaline water electrolyser
  - S8. Energy and cost projection of solid sorbent Direct Air Capture
  - S9. Detailed installed capacities and annual flows of all components in 7 sample locations.
  - S10. Input data
-

## S1. Full Load hours and levelised cost of PV and wind power plants

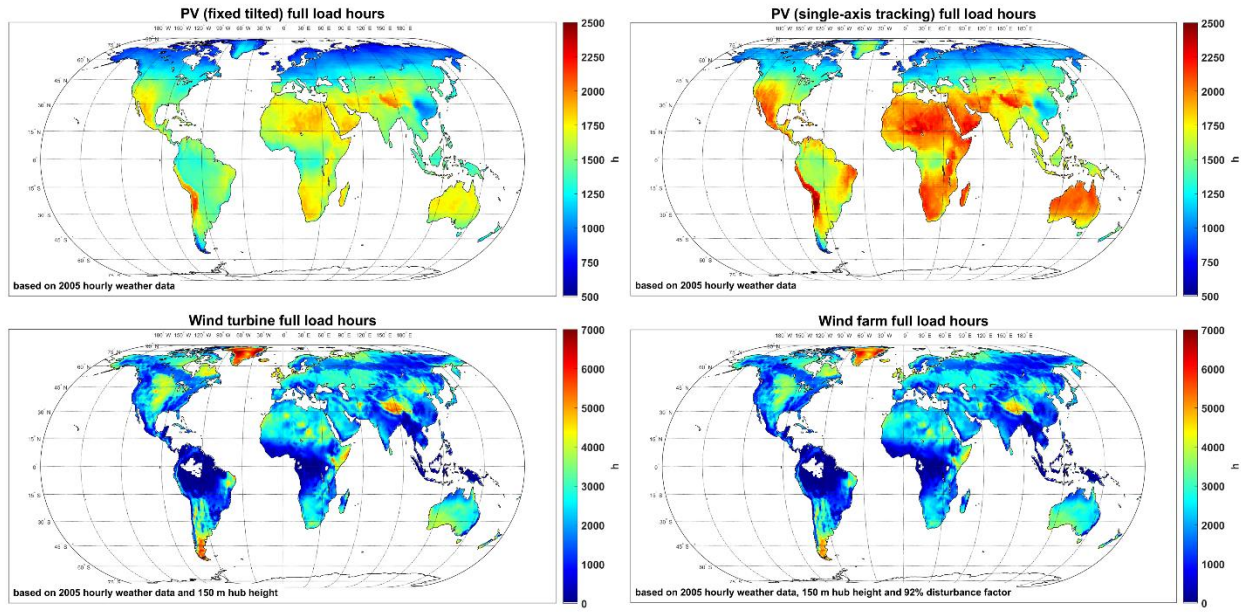

**Fig. S1.** Full Load hours of fixed tilted PV (top left), single-axis tracking PV (top right), wind turbines (bottom left) and wind farm (bottom right).

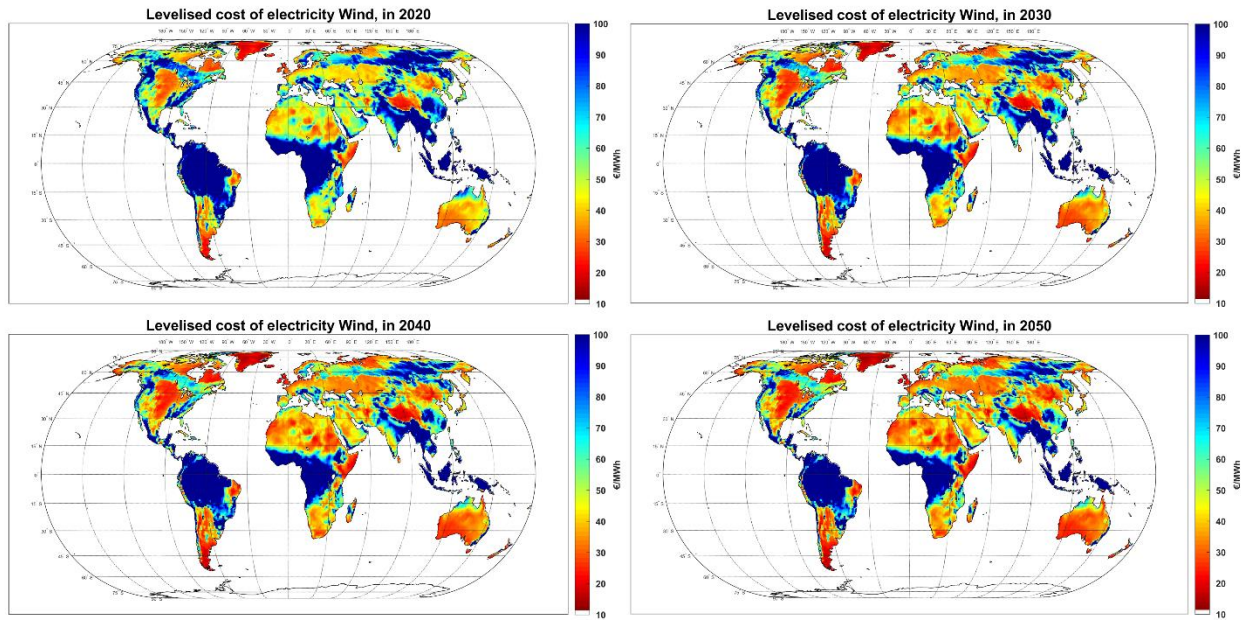

**Fig. S2.** Levelised cost of wind electricity for 2020 (top left), 2030 (top right), 2040 (bottom left) and 2050 (bottom right). Assumptions for 3 MW wind turbines, 150 m hub-height, power plant configuration.

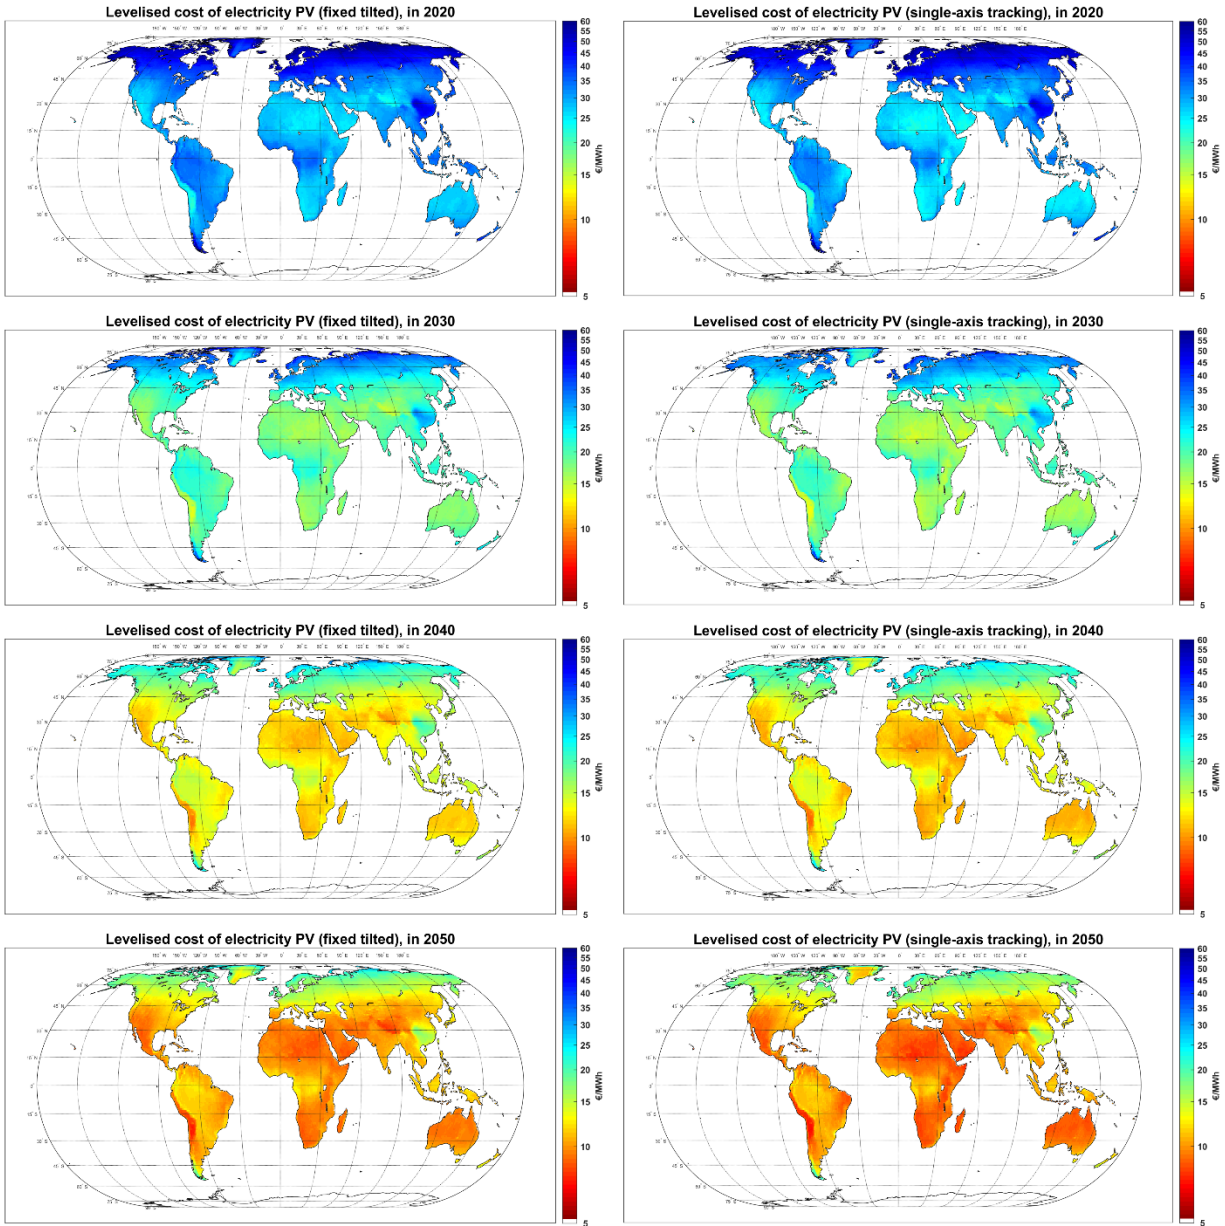

**Fig. S3.** Levelised cost of PV fixed tilted (left) and single-axis tracking (right) for 2020 (top), 2030 (upper centre), 2040 (lower centre) and 2050 (bottom).

## S2. Optimal technology mix and operational behaviour

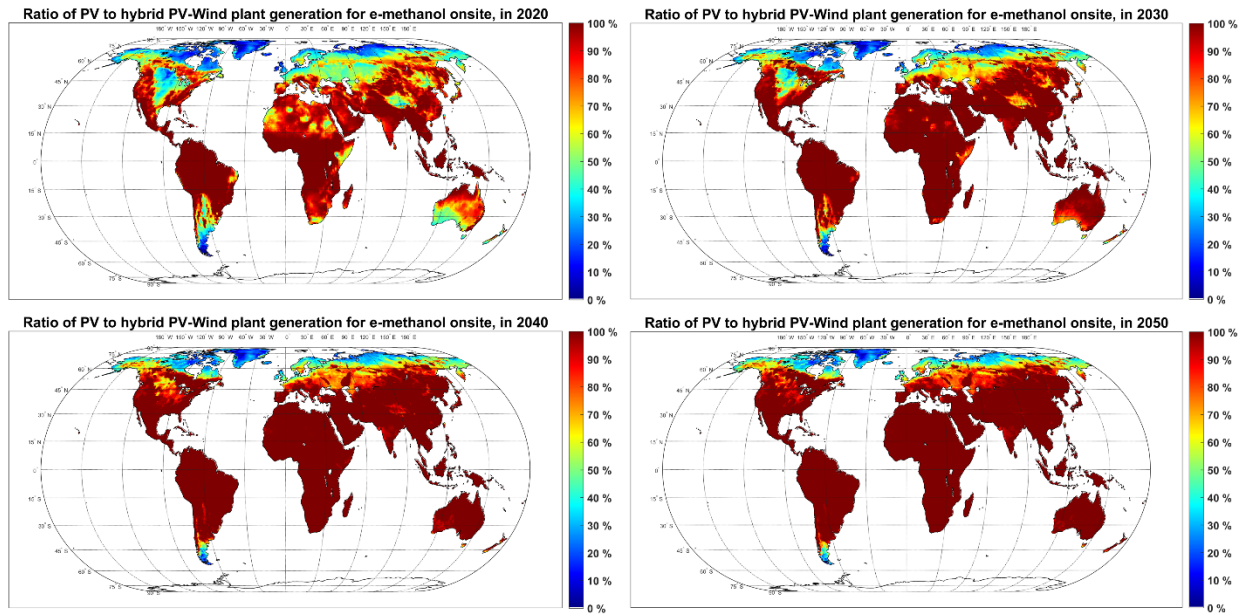

**Fig. S4.** Ratio of PV to hybrid PV-wind installed capacity in 2020 (top left), 2030 (top right), 2040 (bottom left) and 2050 (bottom right).

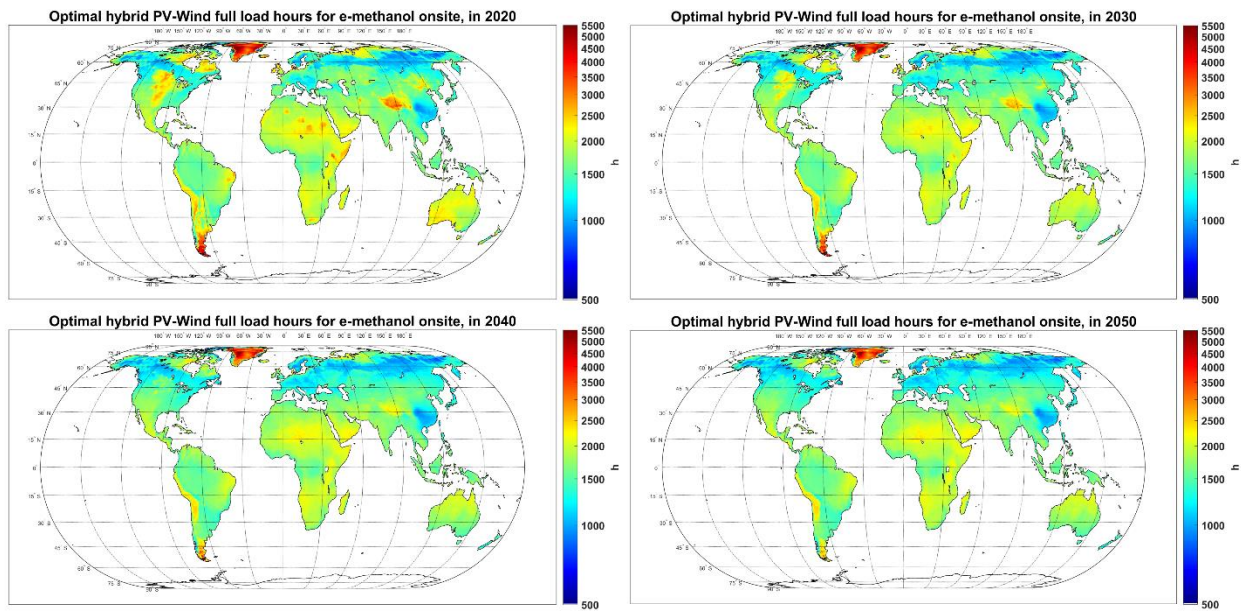

**Fig. S5.** Full Load hours of optimal hybrid PV-wind plant for Onsite e-methanol production in 2020 (top left), 2030 (top right), 2040 (bottom left) and 2050 (bottom right).

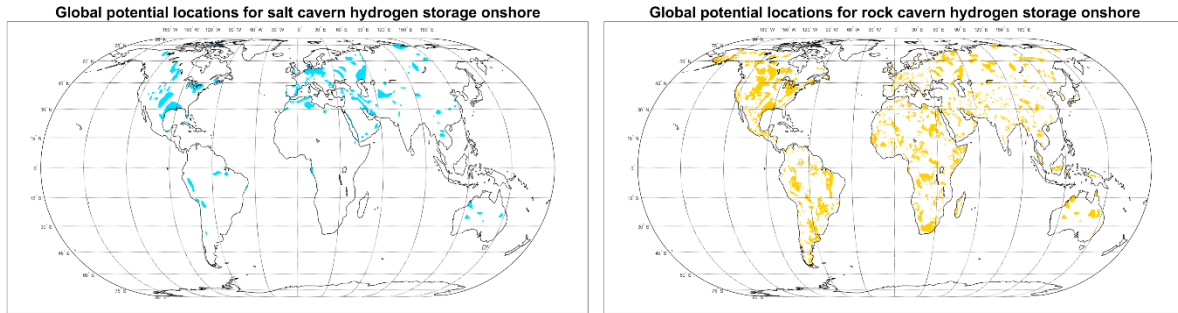

**Fig. S6.** Regions with suitable geological formations for salt cavern (left) and rock cavern (right) hydrogen storage. Data adopted from<sup>1</sup>.

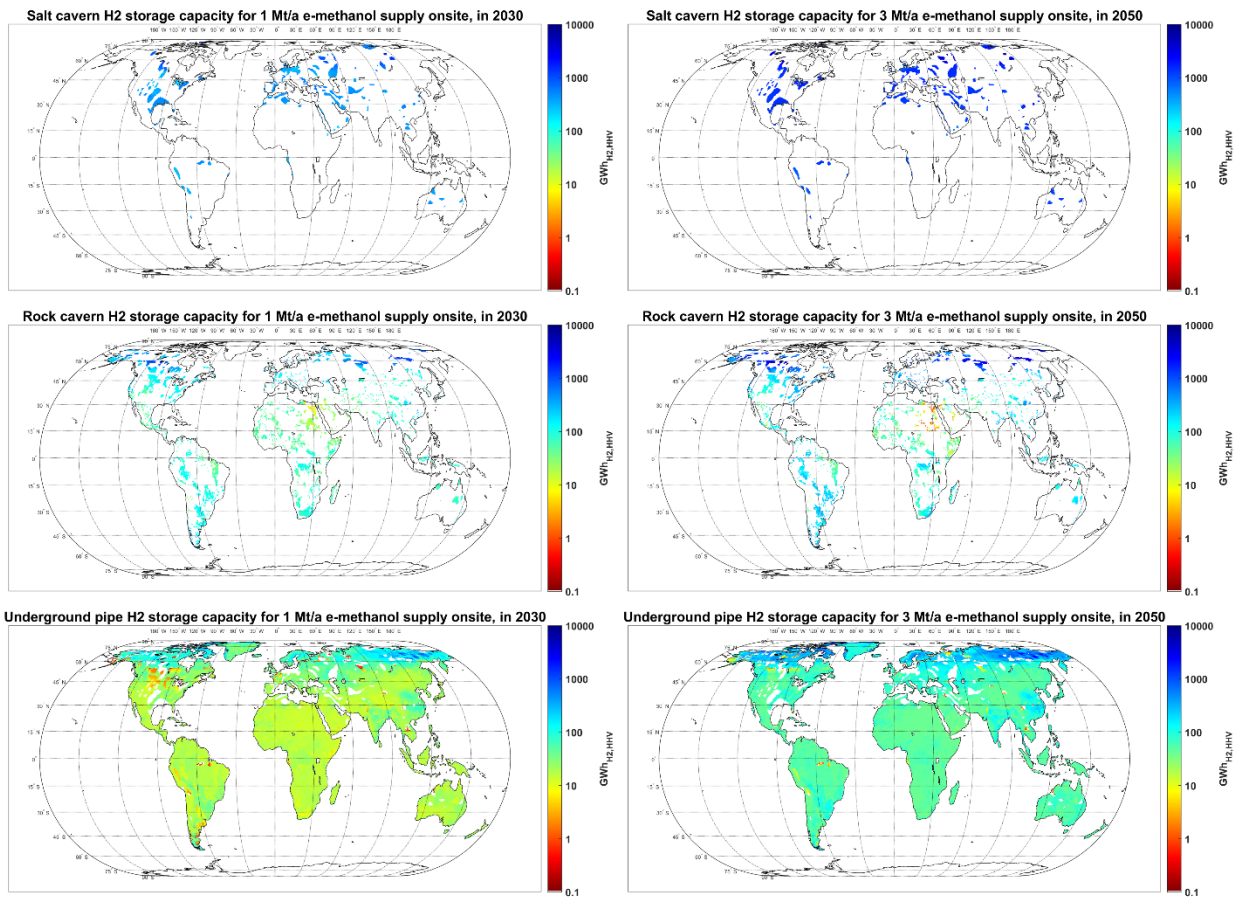

**Fig. S7.** Relevance of salt cavern (top), rock cavern (centre) and underground pipes (bottom) hydrogen storage technologies in 2030 (left) and 2050 (right).

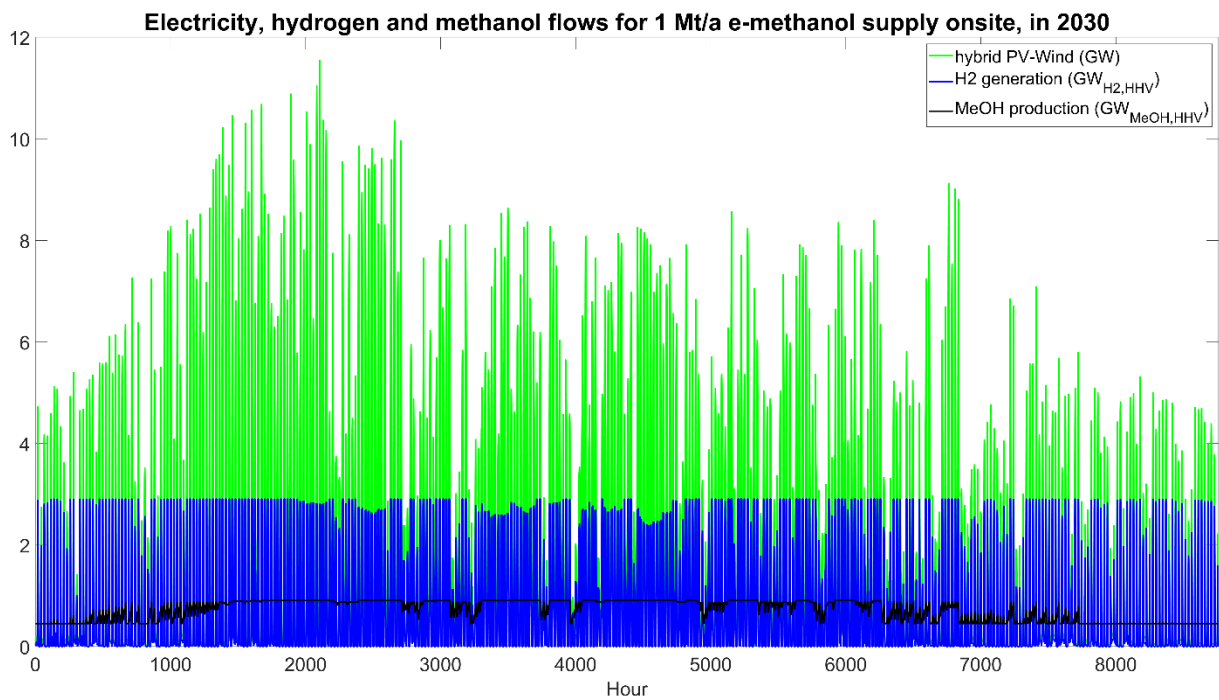

**Fig. S8.** Hourly electricity generation, as well as hydrogen and methanol production in Northeast Canada (49.95°N,75.15°W) with no access to salt or rock cavern hydrogen storage for e-methanol Onsite in 2030.

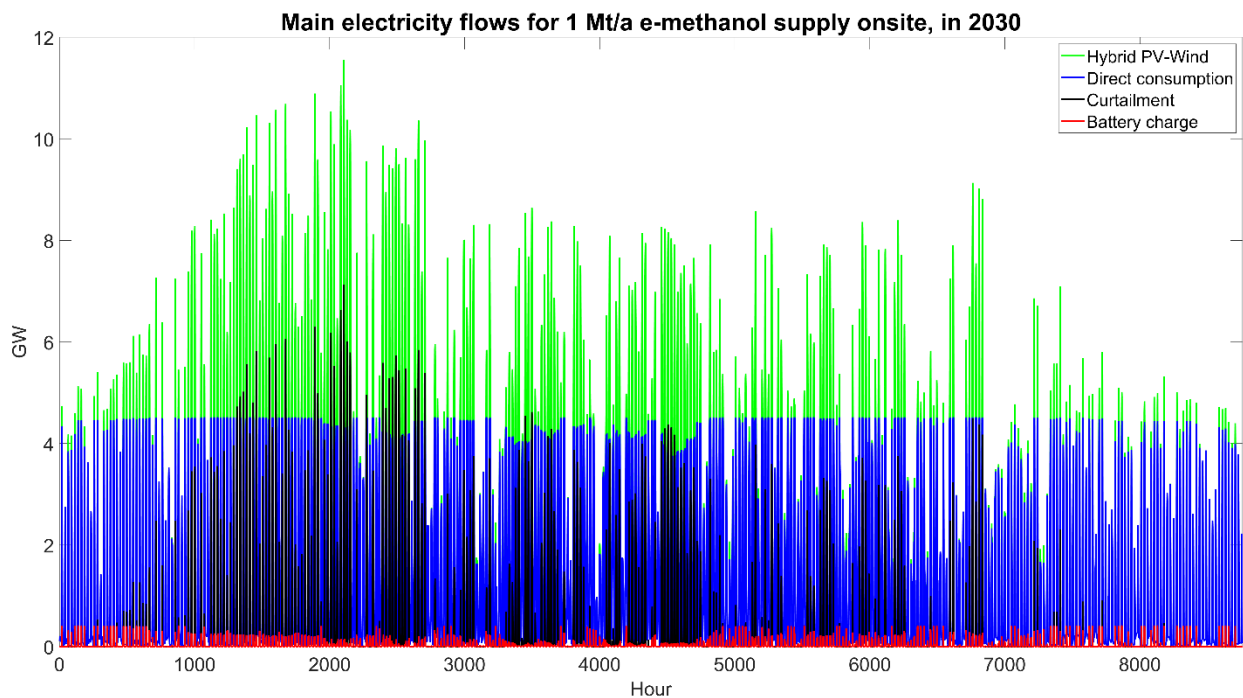

**Fig. S9.** Hourly electricity generation, direct electricity consumption, curtailment, and stored electricity in Northeast Canada (49.95°N,75.15°W) for e-methanol Onsite in 2030.

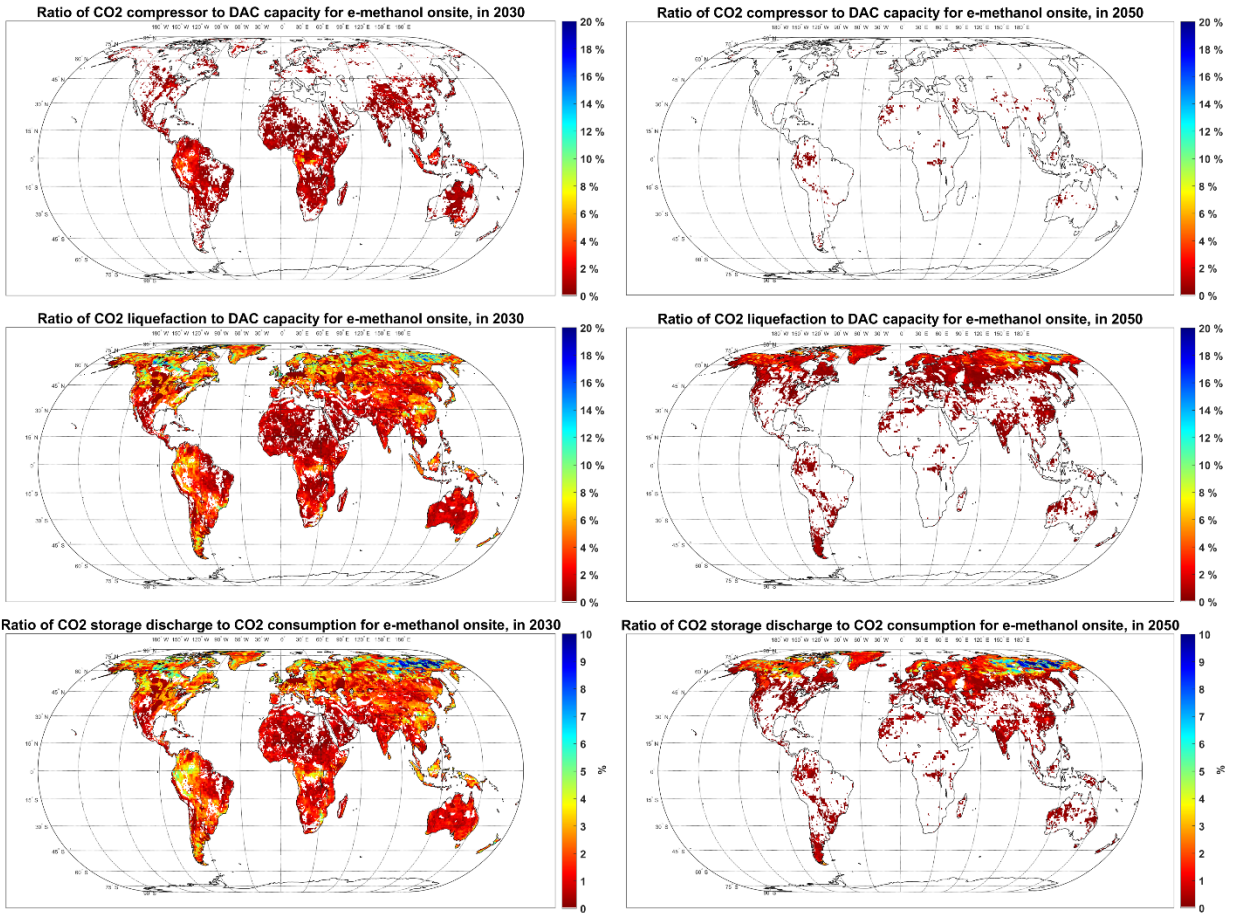

**Fig. S10.** Relevance of CO<sub>2</sub> balancing technologies, including ratio of CO<sub>2</sub> compressor to DAC capacity (top), ratio of CO<sub>2</sub> liquefaction to DAC capacity (centre), and ratio of CO<sub>2</sub> supplied by storage options to the total CO<sub>2</sub> consumption (bottom), in 2030 (left) and 2050 (right).

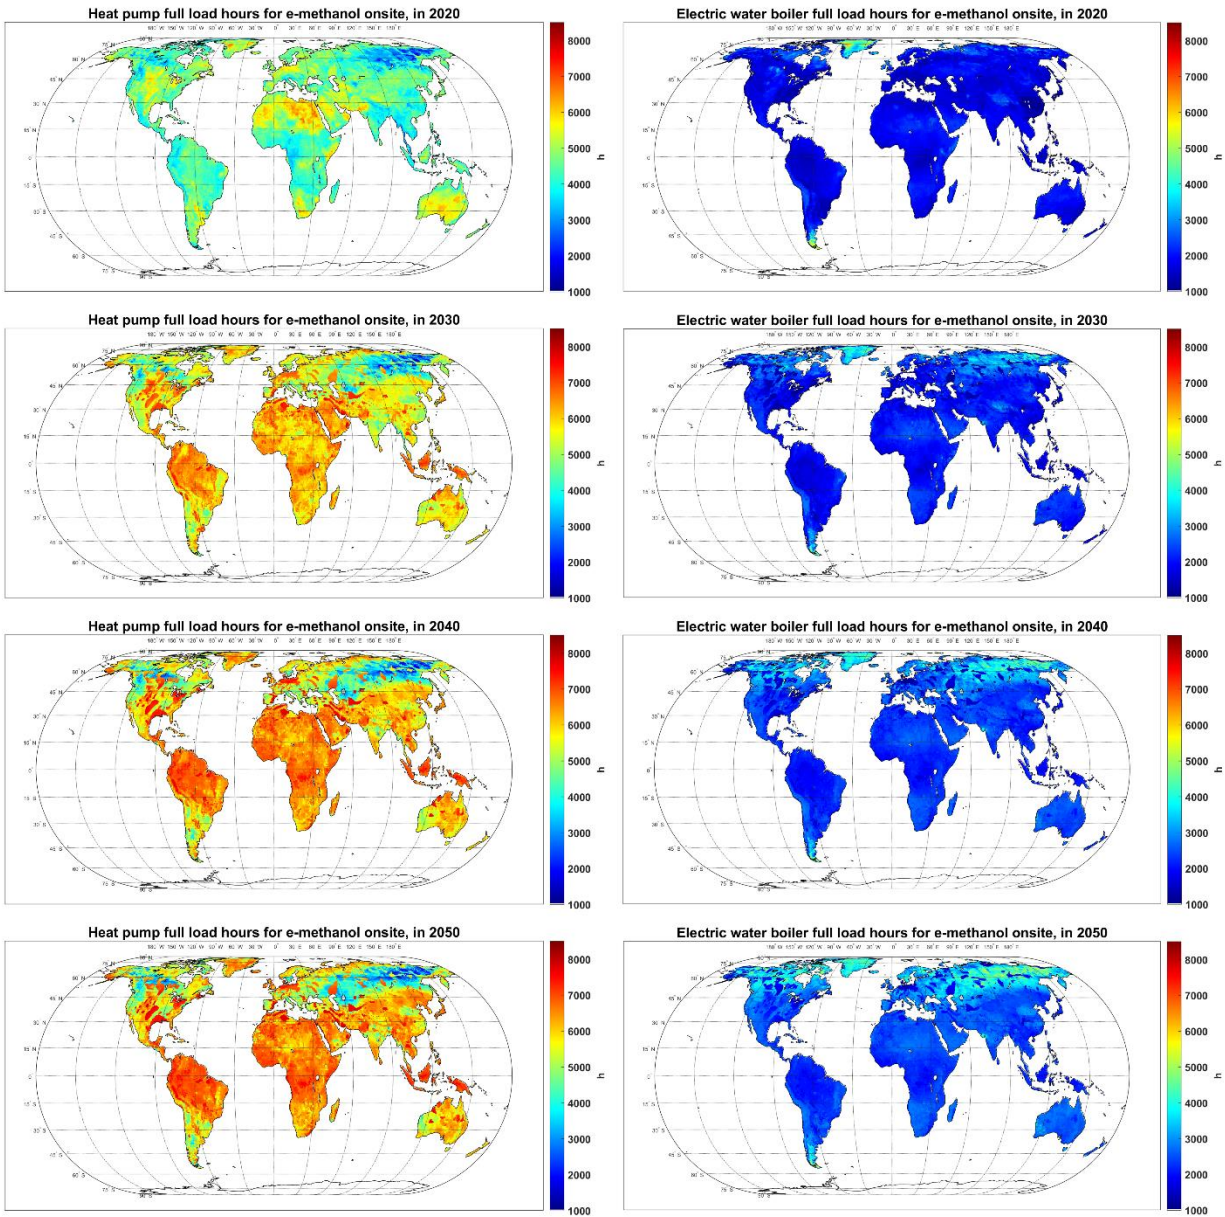

**Fig. S11.** Full Load hours of heat pumps (left) and electric water boilers (right) for e-methanol in 2020-2050.



### S3. Levelised cost of methanol with customised colour bar range based on low-cost regions

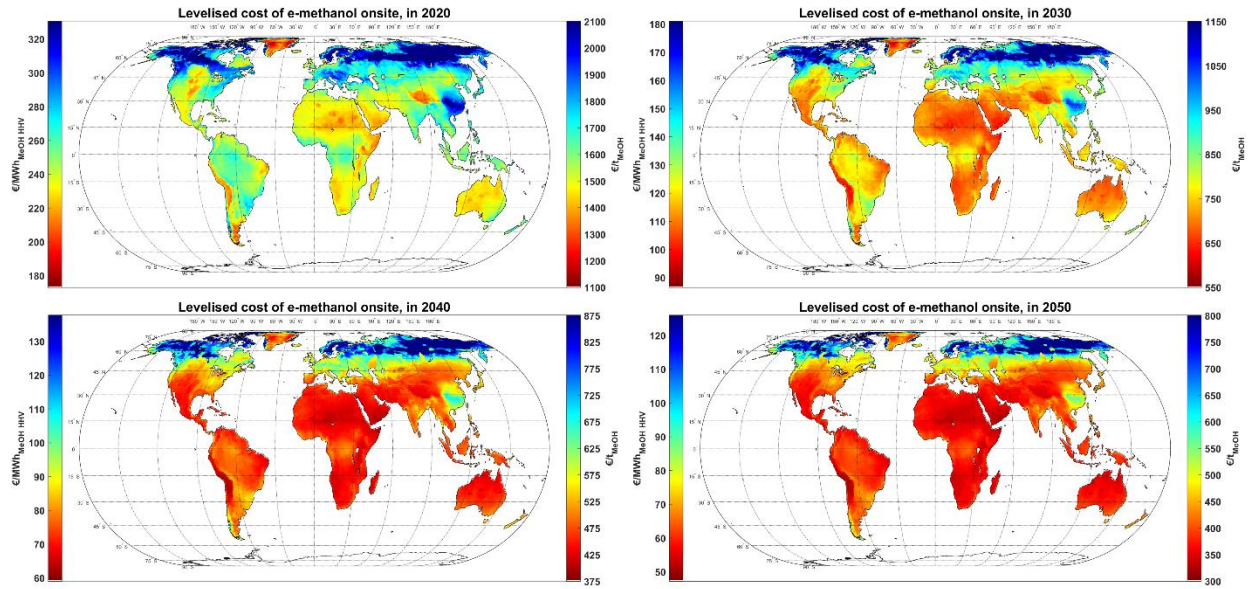

**Fig. S12.** Levelised cost of e-methanol *Onsite* in 2020 (top left), 2030 (top right), 2040 (bottom left) and 2050 (bottom right) with customised colour bar range for each sub-figure.

#### ***S4. Energetic cost comparison of e-methanol and e-ammonia as fuel***

While e-methanol and e-ammonia<sup>2,3</sup> have their own distinguished roles in chemical and agriculture industry, both are also discussed as potential sustainable fuels for long-range marine sector<sup>4</sup>. Thus, a cost comparison of the two e-fuels based on unified assumptions and input data is provided in this section.

The production cost of e-ammonia is based on the model by Fasihi et al.<sup>2</sup> with updated input data to match the assumptions for shared components with the Power-to-Methanol chain in this study. The key update is the unification of electrolyser cost.

The results presented in Figure S13 show that, at 180-220 €/MWh<sub>MeOH,HHV</sub>, the cost of e-methanol from a 0.5 Mt<sub>MeOH/a</sub> supply plant at the least cost regions in 2020 is about double the e-ammonia production cost of 90-110 €/MWh<sub>NH3,HHV</sub> by a 1 Mt/a ammonia supply plant. This cost difference is mainly due to relatively higher cost of atmospheric CO<sub>2</sub> capture for methanol synthesis compared to the cost of atmospheric N<sub>2</sub> capture for ammonia synthesis.

By 2030, as the cost and energy efficiency of DAC plants improve, together with the deployment of 1 Mt/a methanol supply plants at lower capex, the cost of e-methanol at best sites declines by about 50% to 94-104 €/MWh<sub>MeOH,HHV</sub>. Comparatively, the cost of e-ammonia would decline by about 30% to 65-75 €/kWh<sub>NH3,HHV</sub>. By 2050, the gap between production cost of e-methanol and e-ammonia further declines to about 10 €/MWh<sub>th,HHV</sub> (or ~25%) for 50-55 €/MWh<sub>MeOH,HHV</sub> and 39-45 €/MWh<sub>NH3,HHV</sub>.

While the cost of e-methanol production remains higher than e-ammonia, choosing one as potential future sustainable marine fuel is affected by other factors. For example, due to the toxicity and gaseous phase of ammonia at ambient temperatures, methanol is a better option with respect to the cost and safety of fuel handling and transportation. On the other hand, e-ammonia provides the potential to fully eliminate carbon from the fuel supply system, though handling its higher NO<sub>x</sub> emissions could be a challenge<sup>5</sup>. In addition, all technologies for e-ammonia production are mature and available at industrial scale today, whereas the realisation and scale of e-methanol production is largely dependent on future development of DAC technologies, as sustainable and unavoidable point sources are limited and may not match well with the sites of low-cost hydrogen availability<sup>6</sup>.

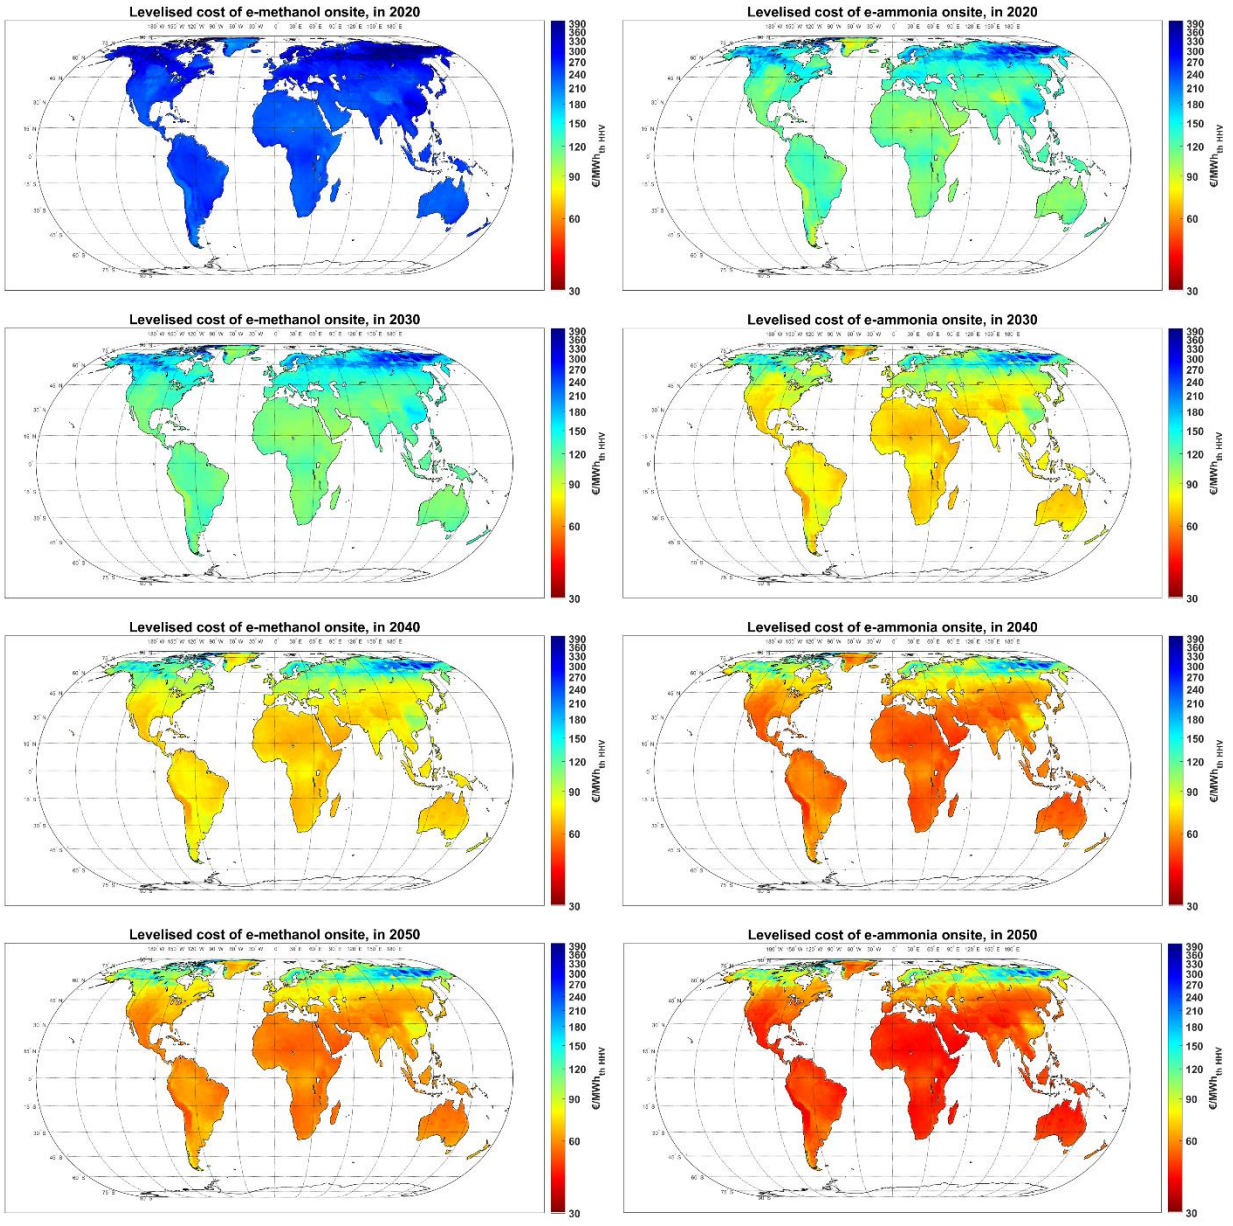

**Fig. S13.** Levelised cost of e-methanol (left) and e-ammonia (right) *Onsite* in 2020-2050.

### S5. Cost benefits of integrated Power-to-Methanol-Ammonia plants

e-Methanol and e-ammonia could potentially have a complementary relation at the production stage. The high temperature waste heat from ammonia synthesis could be used as a source of heat for DAC units in the Power-to-Methanol chain. Thus, a combined Power-to-Ammonia-Methanol system (Fig. S14) has been modelled to assess the additional benefits of heat integration in 2030 and 2050 at different annual ammonia to methanol supply ratios.

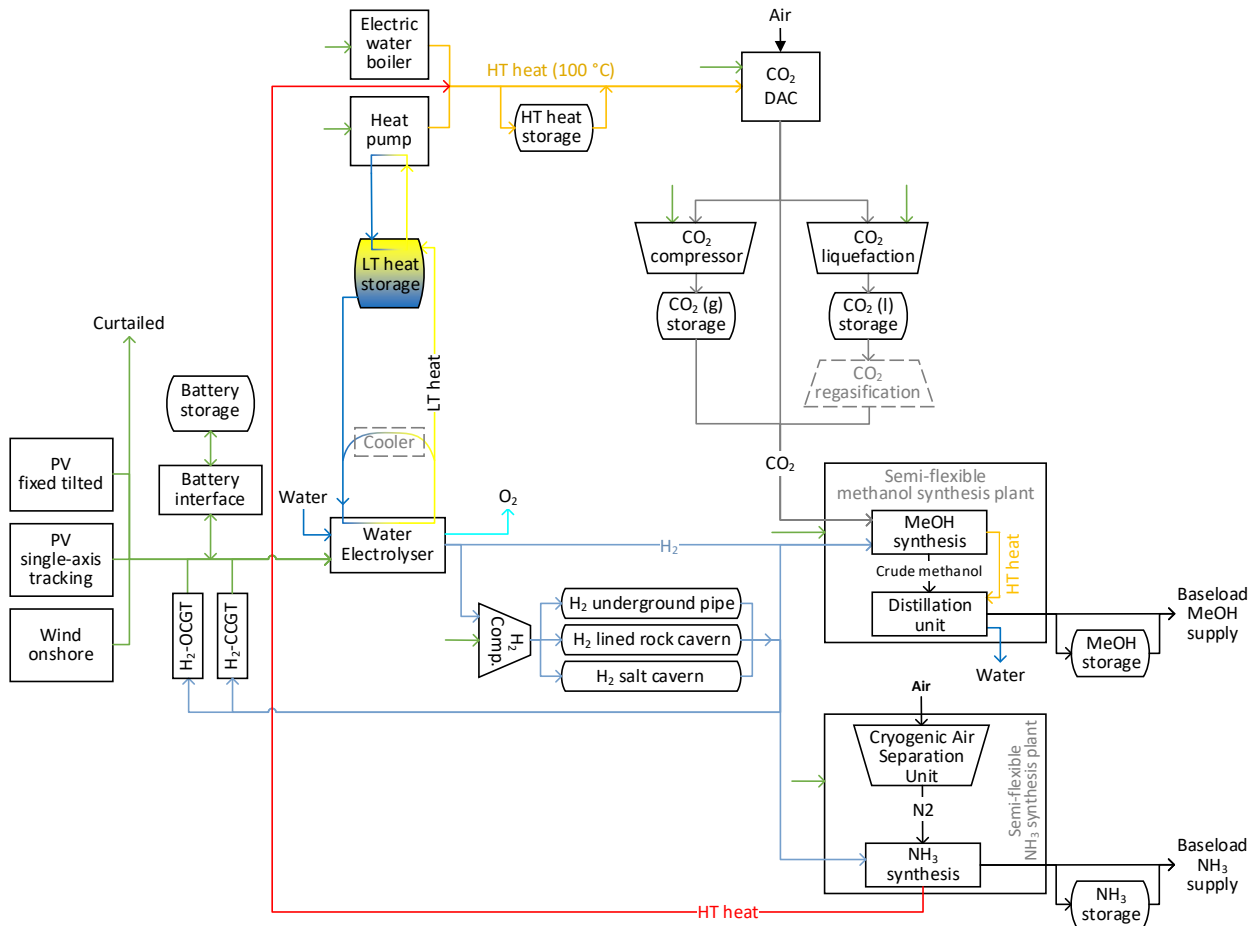

**Fig. S14.** Integrated Power-to-Methanol-Ammonia *Onsite* model configuration. Hydrogen-fuelled gas turbines are considered from 2030 onwards. Abbreviations: H<sub>2</sub>- fuelled open cycle gas turbine (H<sub>2</sub>-OCGT), H<sub>2</sub>-fuelled combined cycle gas turbine (H<sub>2</sub>-CCGT), compressor (Comp.), high temperature heat (HT heat), low temperature heat (LT heat), CO<sub>2</sub> direct air capture (DAC).

In the integrated Power-to-Methanol-Ammonia system, methanol and ammonia synthesis units share the same power and hydrogen supply systems. The shared power and hydrogen systems have higher capacities to meet the elevated demands but could potentially benefit from system coupling for a relatively smaller overall capacity. The additional low-temperature waste heat from the elevated hydrogen production system is available as a heat source for the heat pump and the excess high temperature heat from the ammonia synthesis plant is added to the portfolio of high temperature heat resources. e-Ammonia production in Fasihi et al.<sup>2</sup>, adopted from Morgan<sup>7</sup>, is based on the Haber-Bosch process at 150 bar and 480 °C, which generates 1188 kWh of heat (at 108–394 °C) per tonne of ammonia. However, this design did not consider steam generation and 31% of generated heat (362 kWh/t<sub>NH<sub>3</sub></sub>) is at 108 °C which may not be suitable for heat delivery at 100 °C for utilisation by DAC units. On the other hand, Frattini et al.<sup>8</sup> reported on 1129 kWh of high temperature excess heat per tonne of e-ammonia production from a Haber-Bosch ammonia plant at 250 bar and 550 °C (888 kWh at 550 °C from the synthesis reactor, and 241 kWh at 150 °C from the compressors' cooling system). While such reactor conditions differ to some extent from those in Fasihi et al.<sup>2</sup>, there are no major differences and the overall heat generations are comparable. Thus, Frattini et al.<sup>8</sup> is chosen for representing the full potential of e-ammonia plants for delivering excess heat at temperatures above 100 °C. On the other hand, as the energetic efficiency of DAC increases over time, the e-methanol production system would have a heat demand of 4380, 1936, 1565 and 1432 kWh<sub>th</sub>/t<sub>MeOH</sub> in 2020, 2030, 2040 and 2050, respectively. Therefore, these process conditions suggest that, to supply the total heat demand of e-methanol plants by the waste heat from a standard 1 Mt/a e-ammonia supply plant, the annual e-methanol supply should be limited to 0.26, 0.58, 0.72 and 0.79 Mt in 2020, 2030, 2040 and 2050, respectively. However, e-ammonia plants are expected to be significantly larger to benefit from economies of scale. To study such counter effects, the annual e-ammonia supply from the integrated ammonia plant is set at 1 Mt/a in all scenarios, while the e-methanol supply is set at 0.5 and 1 Mt/a in 2030, as well as 1 and 3 Mt/a in 2050.

Equation S1 is used to evaluate the cost of e-methanol production in the integrated methanol-ammonia system. All the potential benefits of system integration and utilisation of waste heat from ammonia synthesis are assumed to be allocated to the cost reduction of e-methanol supply.

$$LCOF_{MeOH,integrated} [\text{€}/t_{MeOH}] \quad (S1)$$

$$= \frac{\text{Annualised Cost}_{integrated\ system} [\text{M€}] - LCOF_{NH3,solo} \left[ \frac{\text{€}}{t_{NH3}} \right] \cdot 1\text{ Mt}_{NH3}}{e\text{-methanol supply from MeOH-NH3 integrated system} [Mt]}$$

As illustrated in Figure S12, the heat integration by co-production of 1 Mt/a of e-methanol and 1 Mt/a of e-ammonia in 2030 could reduce the cost of e-methanol by 20–30 €/t<sub>MeOH</sub> (3–5 €/MWh<sub>MeOH,HHV</sub>) in most parts of the world, with cost reductions up to 50 €/t<sub>MeOH</sub> (8 €/MWh<sub>MeOH,HHV</sub>) at latitudes above 55 °N. Such absolute cost reductions are equivalent to 3–5% cost drop compared to the Base Cost Scenario (BCS).

The benefits of heat integration in most regions could be increased to 30–50 €/t<sub>MeOH</sub> (5–8 €/MWh<sub>MeOH,HHV</sub>) by reducing the size of e-methanol supply to 0.5 Mt/a in the hybrid system, while the cost reduction at latitude above 55 °N could be 70–100 €/t<sub>MeOH</sub> (11–16 €/MWh<sub>MeOH,HHV</sub>), representing a 5–7% cost decline.

In 2050, combining the reference plant for 3 Mt/a e-methanol supply with 1 Mt/a ammonia supply plant would only reduce the cost of e-methanol supply by 5–10 €/t<sub>MeOH</sub> (0.8–1.6 €/MWh<sub>MeOH,HHV</sub> or ~2%), with parts of the Northern regions reaching 10–15 €/t<sub>MeOH</sub> (1.6–2.4 €/MWh<sub>MeOH,HHV</sub> or 2–3%) cost reduction. The lower cost reduction in 2050 compared to 2030 is associated with 55% lower heat integration per tonne of e-methanol as a result of 27% lower heat demand by DAC units and increasing the size of the integrated methanol plant from 1 to 3 Mt/a supply. In addition, heat could be generated for lower costs by cheaper electricity and heat pumps in 2050 compared to 2030, which makes the availability of partial free waste heat less relevant in 2050.

The results show that, unlike 2030, down-scaling the integrated e-methanol plant from 3 to 1 Mt/a supply in 2050 to elevate the share of waste heat supply per tonne of e-methanol would increase the cost of e-methanol production from the integrated system in most parts of the world, as the gain by higher share of waste heat supply is less than the loss of economies of scale for the methanol synthesis unit. Nevertheless, e-methanol from the 1 Mt/a integrated methanol supply system would still be 1–6 €/t<sub>MeOH</sub> (0.16–0.94 €/MWh<sub>MeOH,HHV</sub> or 0.5–1.5%) lower in cost compared to the Base Cost Scenario with a solo 3 Mt/a methanol supply system. Thus, scaling the methanol plant has a larger impact on e-methanol production cost than heat integration from ammonia plant

in most parts of the world in 2050. An exception would be some Northern regions beyond 60 °N, where the cost reduction of e-methanol is higher for the integrated system with lower methanol plant as more costly power and hydrogen balancing would be avoided.

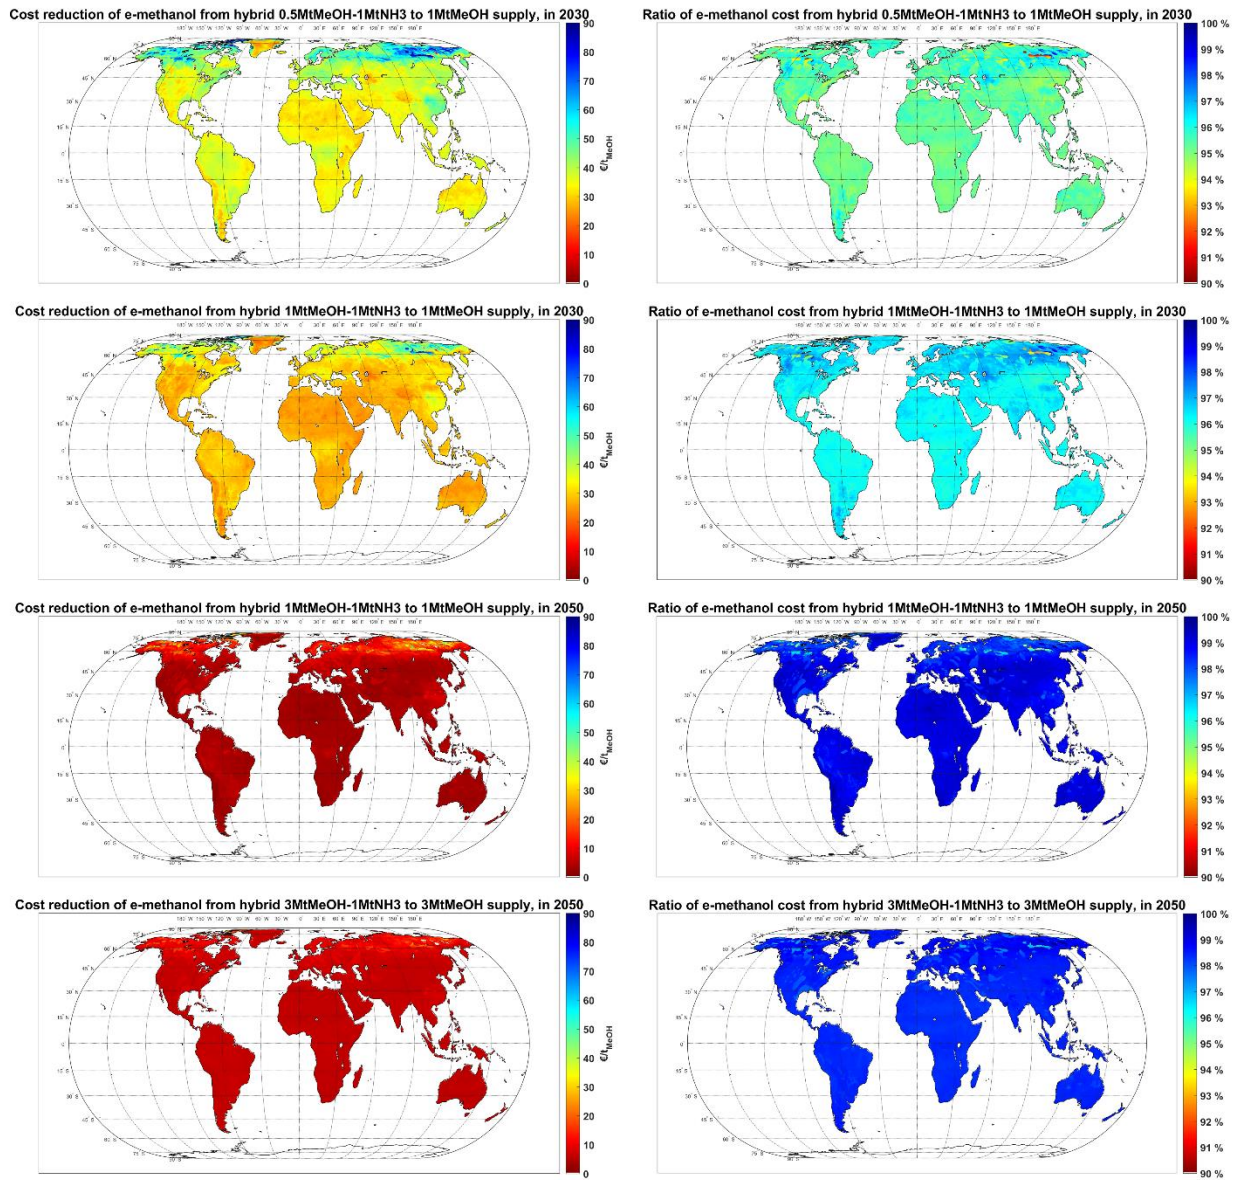

**Fig. S15.** Cost reduction of e-methanol in integrated Power-to-Methanol-Ammonia synthesis plants compared to solo e-methanol plants *Onsite* in absolute (left) and relative (right) values in 20230 (top and centre top)2050 (centre bottom and bottom).

## S6. Sensitivity Analyses

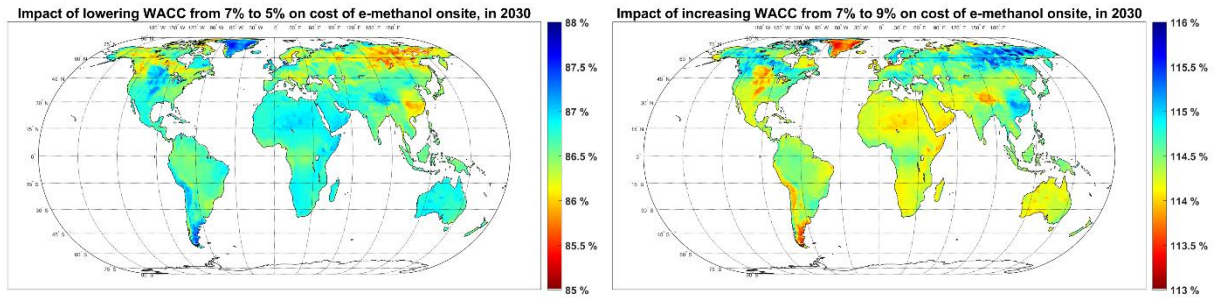

**Fig. S16.** Impact of decreasing WACC to 5% (left) and increasing WACC to 9% (right) in comparison to e-methanol production cost by a WACC of 7% in 2030.

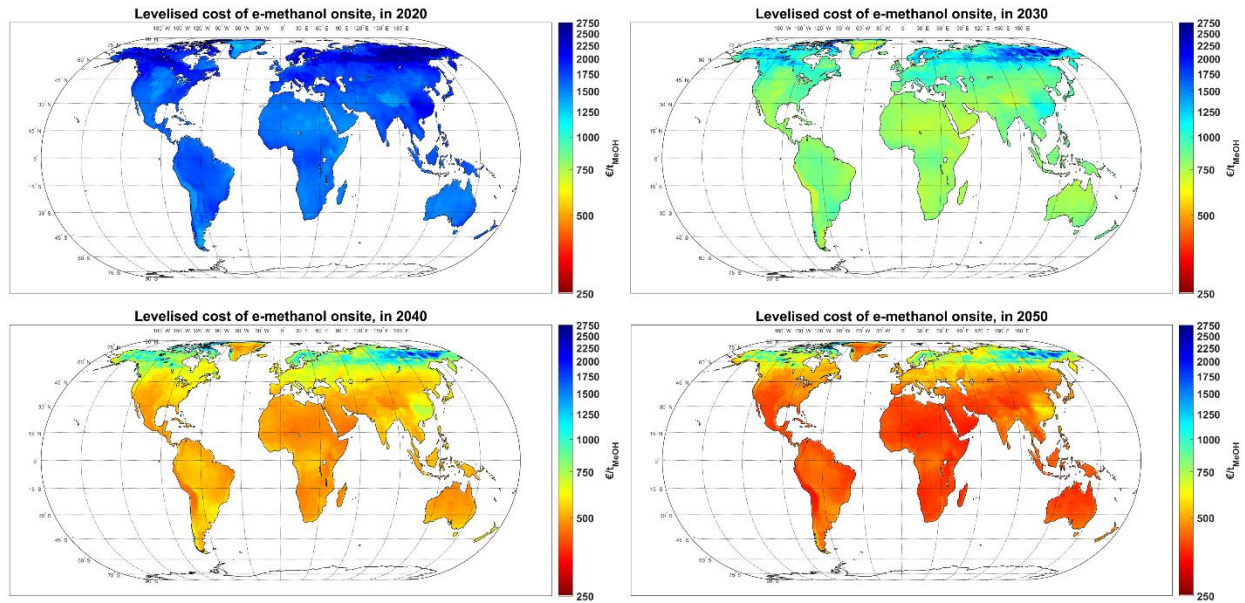

**Fig. S17.** Levelised cost of e-methanol *Onsite* in 2020 (top, left), 2030 (top, right), 2040 (bottom, left) and 2050 (bottom, right) for the *High-Cost Scenario*.



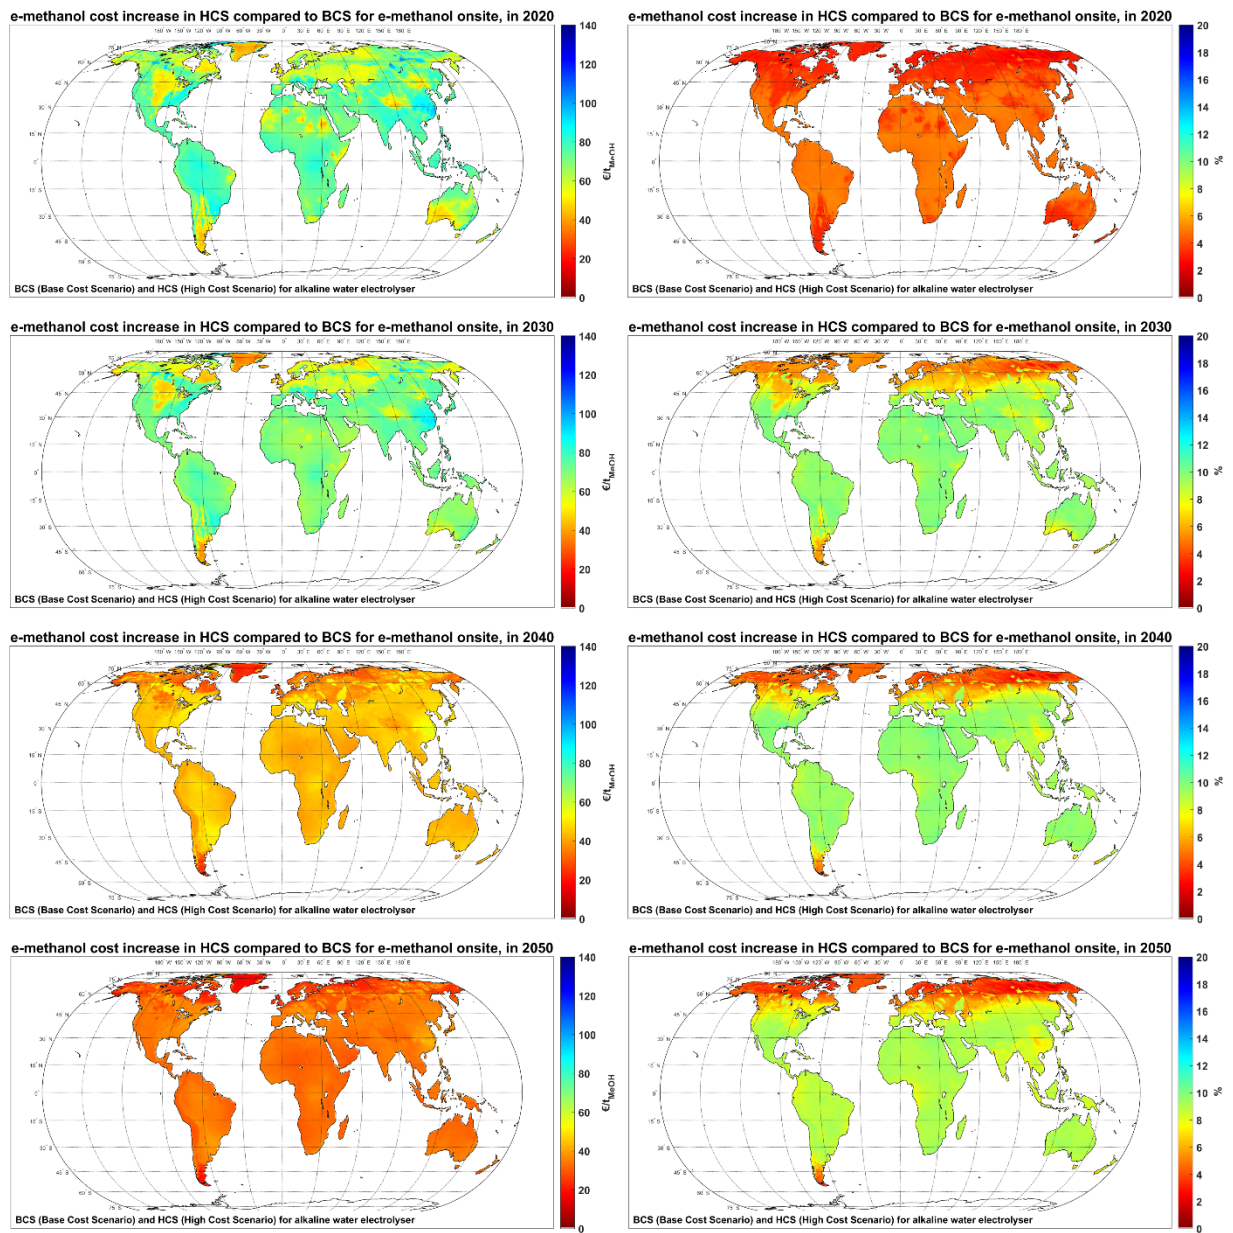

**Fig. S18.** Impact of the High-Cost Scenario for electrolyser capex and fixed opex on the levelised cost of e-methanol *Onsite* in 2020-2050.

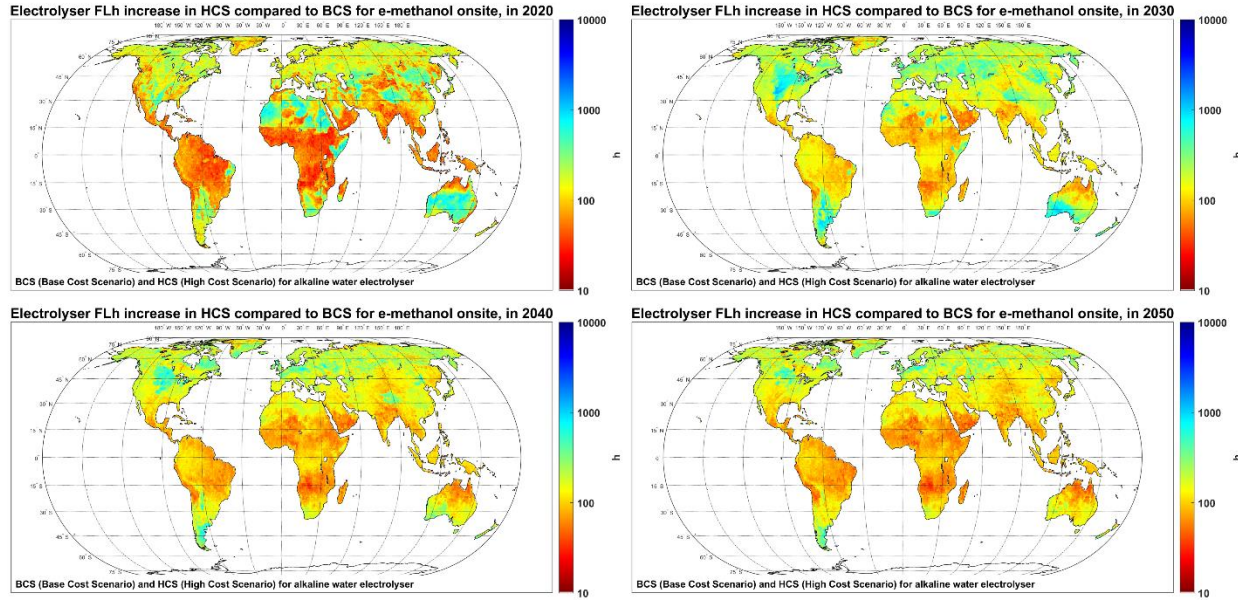

**Fig. S19.** Electrolyser FLh increase in the *High-Cost Scenario* compared to the *Base Cost Scenario* for 2020-2050.

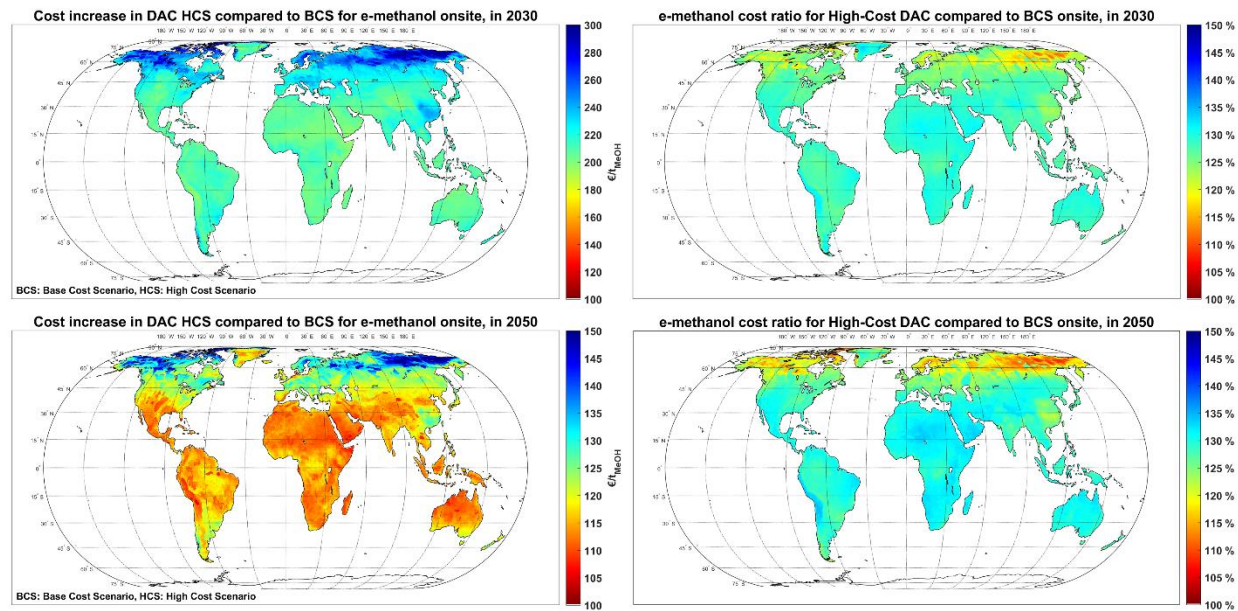

**Fig. S20.** Impact of the High-Cost Scenario for DAC capex and fixed opex, and energy demand on the levelised cost of e-methanol *Onsite* in 2030 (tops) and 2050 (bottom).

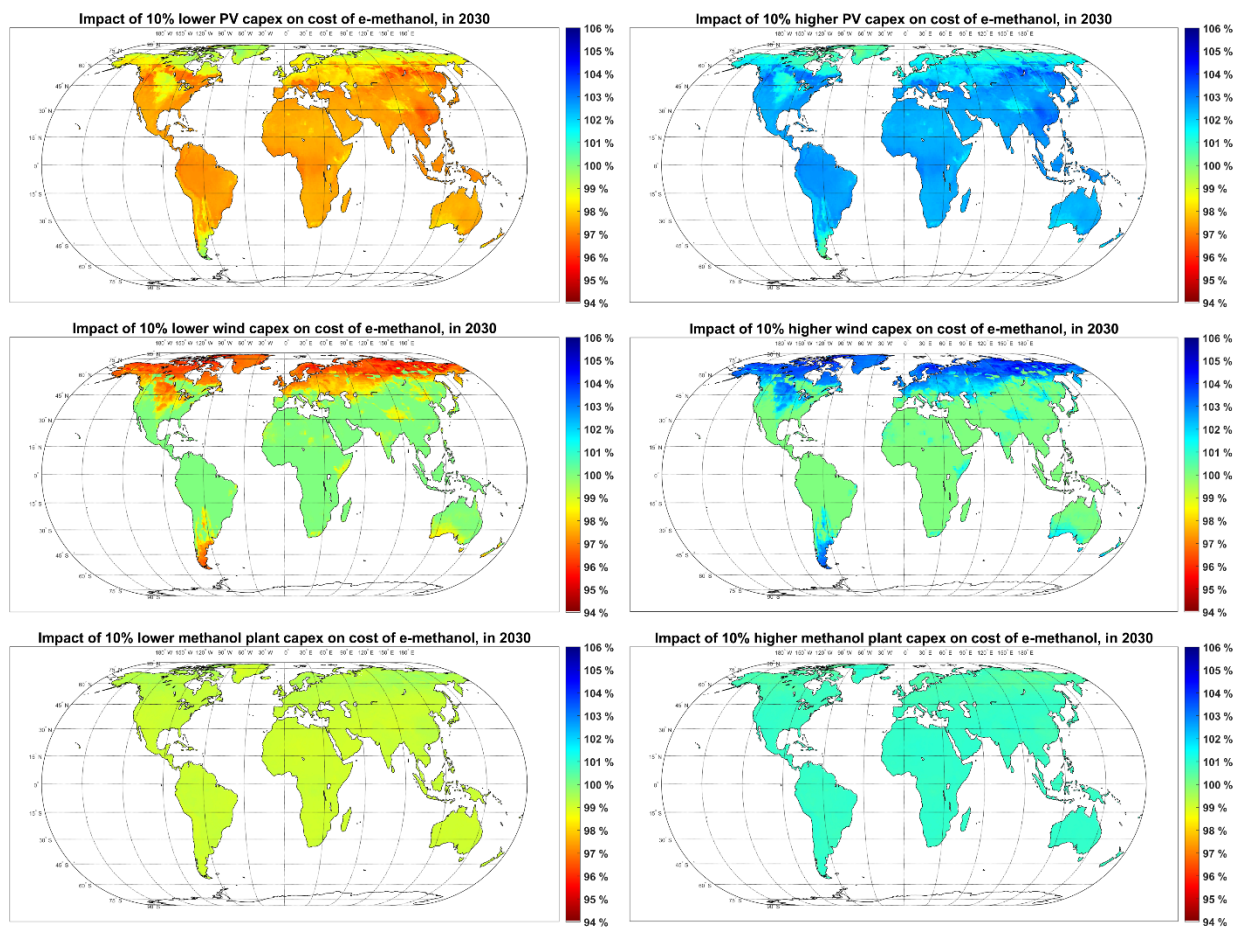

**Fig. S21.** Impact of 10% change in the capex and fixed opex of solar PV (top), wind power (centre) and methanol plants (bottom) on levelised cost of e-methanol *Onsite* in 2030.

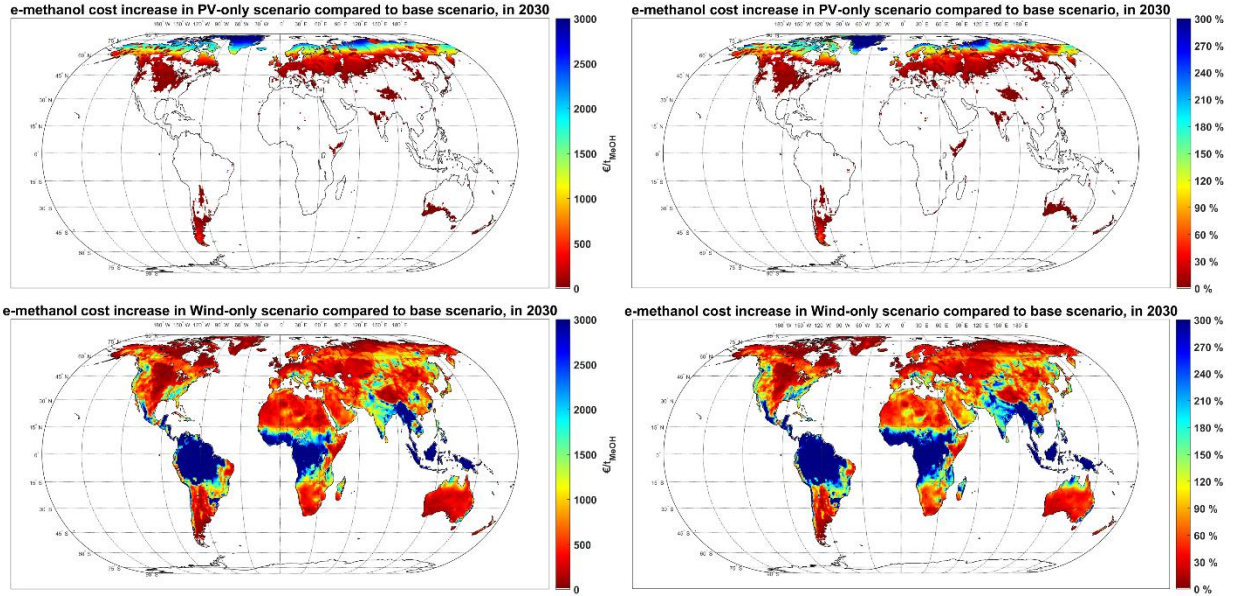

**Fig. S22.** Impact of PV-only (top) and wind-only (bottom) power scenarios on the levelised cost of e-methanol compared to the optimised hybrid PV-wind system in 2030.

### S7. Cost projection of alkaline water electrolyser

Capex of a cluster of alkaline water electrolysers in 2020:

- 28 MW<sub>p</sub> (17.5 MW<sub>H<sub>2</sub>,LHV</sub>) at 5 bara: 638 €/kW<sub>p</sub> (confidential quote from a European supplier)
- 28 MW<sub>p</sub> (17.5 MW<sub>H<sub>2</sub>,LHV</sub>) at 30 bara: 732 €/kW<sub>p</sub> (including cost of H<sub>2</sub> compressor)
- 250 MW<sub>p</sub> (156.3 MW<sub>H<sub>2</sub>,LHV</sub>) at 30 bara: 600 €/kW<sub>p</sub> (based on scaling factors for electrolyser and H<sub>2</sub> compressor)

The cost development of alkaline water electrolysers, in Table S1, has been evaluated based on an assumed learning rate<sup>9-12</sup> and an S-curve deployment of operational capacity of water and chlor-alkali electrolysers for a supply of 50% of required hydrogen for e-fuels<sup>13</sup> and e-chemicals<sup>14</sup> in a 100% renewable energy system by 2050.

Table S1. Capex development of alkaline water electrolyser.

|                                                      |                    | 2020 | 2025 | 2030 | 2035  | 2040  | 2045  | 2050   |
|------------------------------------------------------|--------------------|------|------|------|-------|-------|-------|--------|
| Water and chlor-alkali electrolysers                 |                    |      |      |      |       |       |       |        |
| Operational capacity                                 | GW <sub>el</sub>   | 30   | 124  | 499  | 1 558 | 3 658 | 6 668 | 9 980  |
| Newly installed capacity                             | GW <sub>el</sub>   | 6.6  | 93   | 375  | 1 060 | 2 099 | 3 011 | 3 319  |
| Cumulative installed capacity                        | GW <sub>el</sub>   | 52   | 145  | 520  | 1 580 | 3 679 | 6 689 | 10 008 |
| Water electrolysers - 250 MW <sub>p</sub> at 30 bara |                    |      |      |      |       |       |       |        |
| Learning rate                                        | %                  | 18   | 18   | 17   | 17    | 16    | 16    | 15     |
| Capex                                                | €/kW <sub>el</sub> | 600  | 446  | 316  | 234   | 189   | 163   | 148    |

## S8. Energy and cost projection of solid sorbent Direct Air Capture

The current and projected electrical and thermal energy demand of low temperature solid sorbent DAC technologies varies significantly in the literature, as shown in Table S2. The list includes data published over time by Climeworks (the only company with commercial scale solid sorbent DAC plants), recent academic literature, and a potential range of energetic demands by the National Academies of Sciences, Engineering, and Medicine.

Table S2. Energy demand of solid sorbent DAC plants in the literature.

|                                                                                | electricity demand                  | heat demand                         | Comment                                                                                                  |
|--------------------------------------------------------------------------------|-------------------------------------|-------------------------------------|----------------------------------------------------------------------------------------------------------|
|                                                                                | kWh <sub>el</sub> /tCO <sub>2</sub> | kWh <sub>th</sub> /tCO <sub>2</sub> |                                                                                                          |
| Climeworks factsheet (2018) <sup>15</sup>                                      | 700                                 | 2200                                | including electricity demand for carbon storage process                                                  |
| Beuttler et al. (2019) <sup>16</sup>                                           | 400                                 | 1600                                | long-term projections by Climeworks for DACCS                                                            |
| Climeworks website FAQ (2021) <sup>17</sup>                                    | 650                                 | 2000                                | accessible via <a href="https://archive.org/web/">https://archive.org/web/</a>                           |
| Deutz and Bardow (2021) <sup>18</sup>                                          | 700                                 | 3300                                | based on Climeworks' Artic Fox unit in Iceland                                                           |
|                                                                                | 500                                 | 1500                                | future target values                                                                                     |
| Climeworks (2023) <sup>19</sup>                                                | direct number not available         | not available                       | Climeworks' next generation technology is expected to halve the energy demand compared to the Orca plant |
| National Academies of Sciences, Engineering, and Medicine (2019) <sup>20</sup> | 22                                  | 514                                 | best scenario – a scenario that may be unachievable                                                      |
|                                                                                | 156                                 | 944                                 | low scenario                                                                                             |
|                                                                                | 315                                 | 1333                                | high scenario                                                                                            |
| Sabatino et al. (2021) <sup>21</sup>                                           | 80–160                              | 1000–2500                           | based on several sorbents and different isotopes of CO <sub>2</sub> and water (excluding outlying data)  |
| Sendi et al. (2022) <sup>22</sup>                                              | 250                                 | 1930                                | CO <sub>2</sub> capture at 20 °C and 50% relative humidity, and CO <sub>2</sub> compression to 150 bar   |
|                                                                                | 160                                 | 1930                                | excluding approximate electricity demand for CO <sub>2</sub> compression to 150 bar                      |
| Wiegner et al. (2022) <sup>23</sup>                                            | 329–347                             | 1704–1820                           | CO <sub>2</sub> capture at 20 °C and 75% relative humidity (excluding outlying data)                     |

Reliable data on investment cost of solid sorbent DAC plants based on actual plants is scarce. In this study, the current and near future energy demand and capex of low-temperature solid sorbent DAC are based on Climeworks' current and next generation plants (Table S3). With 4000 tCO<sub>2</sub> per year capacity, the Orca plant in Iceland is Climeworks' largest solid sorbent DAC plant operational since 2021. The capex of the Orca plant for carbon capture and sequestration is reported at 10–15 mUSD<sup>24</sup>. We consider an average of 12.5 mUSD for carbon capture only (excluding the sequestration process) with a long-term USD/€ exchange rate of 1.2. So far, the average energy

consumption of the Orca plant has not been disclosed. However, it has been mentioned that the Orca plant has not been optimised for energy efficiency. Thus, we estimate its electricity demand to be same as earlier plants at 700 kWh/t<sub>CO2</sub>, and its heat demand at 3000 kWh<sub>th</sub>/t<sub>CO2</sub>, considering some improvements compared to the heat demand of the Artic Fox DAC unit. Climeworks next project (Mammoth) is based on the same technology as the Orca plant and is expected to become operational in 2024. Regardless of 9 times larger capacity compared to Orca, Climeworks expects similar capex for the Mammoth plant. This is because addressing the problems identified during the operation of the Orca plant increases the capex of the Mammoth plant that offsets the benefit of the economy of scale. In the Direct Air Capture Summit 2023<sup>19</sup>, Climeworks revealed that their next project after Mammoth would be based on their next generation technology and about 10 times larger. The next generation technology is reported to have two times higher output density, leading to a scaling factor of 0.7 for a 10 times larger plant compared to the Mammoth plant. The next generation technology is also reported to reduce the energy demand by 50% compared to the Orca and Mammoth plants<sup>19</sup>. Since Climeworks has not distinguished the electrical and thermal efficiency gains, we consider the same reduction rate for both. Nevertheless, both electrical and thermal energy demand remain within the feasible range in the literature.

Table S3. Specifications of Climeworks' current and near future DAC plants.

| Project name       | Unit                                | Orca   | Mammoth | Next generation technology | comment         |
|--------------------|-------------------------------------|--------|---------|----------------------------|-----------------|
| Year               |                                     | 2021   | 2024    | ~2027                      |                 |
| Capacity           | kt <sub>CO2</sub> /a                | 4      | 36      | 360                        |                 |
| Full load hours    | h                                   | 8000   | 8000    | 8000                       | self-assumption |
| Capital cost       | M€                                  | 10.4   | 93.7    | 564                        |                 |
| Capex              | €/t <sub>CO2</sub> ·a               | 2378   | 2378    | 1192                       |                 |
|                    | €/kg <sub>CO2</sub> ·h              | 20,833 | 20,833  | 10,441                     |                 |
| Electricity demand | kWh <sub>el</sub> /t <sub>CO2</sub> | 700    | 700     | 350                        | self-estimation |
| LT heat demand     | kWh <sub>th</sub> /t <sub>CO2</sub> | 3000   | 3000    | 1500                       | self-estimation |

According to the International Energy Agency (IEA), a total of 1.85 Mt<sub>CO2</sub>/a of solid sorbent DAC projects are already at different stages for deployment by 2027<sup>25</sup>. We then consider a S-curve development of the operational capacity of solid sorbent DAC to 2.5 Gt<sub>CO2</sub>/a by 2050 (Table S4), well below estimations for required DAC capacity by mid-century<sup>26</sup>. The capex and energy demand of DAC in 2028–2050 are then calculated based on the cumulative installed capacity of

DAC at each time-step and the respective learning rates. A capex learning rate of 10–18% and an energy consumption learning rate of up to 10% are often considered for modular low-temperature solid sorbent DAC plants<sup>19,27</sup>. In this study, a learning rate of 12% and 4% are considered for capex and energy demand of low-temperature DAC, respectively. As such, the projected electricity and heat demand of DAC plants in 2050 (Table S4) remain well above the “low scenario” by the National Academies of Sciences, Engineering, and Medicine provided in the Table S2. Young et al.<sup>27</sup> report on a sorbent cost of 37 USD/t<sub>CO2</sub> and a learning rate of 10–18% learning rate. A learning rate of 10% for the sorbent is used in this study.

Table S4. Projected long-term specifications of DAC plants.

|                     | Unit                                | 2020/21 | 2024/25 | 2027   | 2030 | 2035 | 2040 | 2045 | 2050 |
|---------------------|-------------------------------------|---------|---------|--------|------|------|------|------|------|
| Cumulative capacity | Mt <sub>CO2</sub> /a                | -       | -       | 1.85   | 15   | 110  | 550  | 1375 | 2500 |
| Unit capacity       | kt <sub>CO2</sub> /a                | 4       | 36      | 360    | 360  | 360  | 360  | 360  | 360  |
| Capex               | €/t <sub>CO2</sub> ·a               | 2378    | 2378    | 1192   | 810  | 561  | 417  | 352  | 315  |
|                     | €/kg <sub>CO2</sub> ·h              | 20,833  | 20,833  | 10,441 | 7096 | 4914 | 3653 | 3084 | 2759 |
| Electricity demand  | kWh <sub>el</sub> /t <sub>CO2</sub> | 700     | 700     | 350    | 309  | 275  | 250  | 237  | 229  |
| LT heat demand      | kWh <sub>th</sub> /t <sub>CO2</sub> | 3000    | 3000    | 1500   | 1326 | 1179 | 1072 | 1016 | 981  |
| Sorbent cost        | €/t <sub>CO2</sub>                  | 31      | 31      | 25.4   | 18.5 | 13.7 | 10.7 | 9.3  | 8.5  |



**S9. Detailed installed capacities and annual flows of all components in 7 sample locations.**

Table S5. Location of seven sample sites for e-methanol plants.

| Abbreviation | CHL-PAT           | AUS             | US-CA           | CHL-ATA         | DEU        | FIN           | OMN            |
|--------------|-------------------|-----------------|-----------------|-----------------|------------|---------------|----------------|
| Location     | Chile - Patagonia | Australia       | US - California | Chile - Atacama | Germany    | Finland       | Oman           |
| [Lat, Lon]   | [-52.65, -72.45]  | [-18.9, 123.75] | [35.1, -117]    | [-23.85, -69.3] | [54, 12.6] | [63.45, 22.5] | [22.05, 58.95] |

Table S6. Installed capacities of Power-to-Methanol plants for a 1 Mt/a methanol supply in 2030.

| Item                            | Unit                             | CHL-PAT   | AUS       | US-CA    | CHL-ATA  | DEU       | FIN      | OMN      |
|---------------------------------|----------------------------------|-----------|-----------|----------|----------|-----------|----------|----------|
| PV fixed tilted                 | MW                               | 17.6      | 0.0       | 7 393.6  | 2 390.6  | 3 339.2   | 509.1    | 660.0    |
| PV single-axis tracking         | MW                               | 0.0       | 6 041.0   | 0.0      | 3 458.0  | 369.7     | 3 301.1  | 5 886.2  |
| Wind PP                         | MW                               | 2 346.1   | 0.0       | 127.5    | 0.0      | 2 443.2   | 2 688.6  | 0.0      |
| H <sub>2</sub> -CCGT            | MW                               | 0.0       | 0.0       | 0.0      | 0.0      | 0.0       | 0.0      | 0.0      |
| H <sub>2</sub> -OCGT            | MW                               | 19.8      | 0.0       | 0.0      | 0.0      | 16.0      | 0.0      | 0.0      |
| Battery interface               | MW                               | 0.0       | 343.5     | 278.0    | 321.9    | 53.8      | 68.3     | 374.4    |
| Battery storage                 | MWh                              | 0.1       | 1 731.9   | 1 024.1  | 1 384.8  | 231.5     | 279.9    | 1 517.2  |
| Electrolyser                    | MW <sub>H<sub>2</sub>,HHV</sub>  | 1 454.0   | 2 536.5   | 2 674.6  | 2 386.7  | 1 705.7   | 1 764.8  | 2 402.1  |
| H <sub>2</sub> compressor       | MW <sub>H<sub>2</sub>,HHV</sub>  | 456.9     | 1 632.2   | 1 739.4  | 1 411.6  | 786.1     | 766.2    | 1 435.0  |
| H <sub>2</sub> salt cavern      | MWh <sub>H<sub>2</sub>,HHV</sub> | 0.0       | 391 720.6 | 0.0      | 0.0      | 391 456.8 | 0.0      | 0.0      |
| H <sub>2</sub> rock cavern      | MWh <sub>H<sub>2</sub>,HHV</sub> | 178 597.6 | 0.8       | 0.0      | 0.0      | 0.0       | 0.0      | 0.0      |
| H <sub>2</sub> underground pipe | MWh <sub>H<sub>2</sub>,HHV</sub> | 1 227.0   | 0.1       | 15 268.8 | 13 581.1 | 0.1       | 65 858.4 | 13 776.4 |
| DAC                             | t <sub>CO<sub>2</sub></sub> /h   | 203.0     | 184.3     | 210.6    | 203.0    | 188.1     | 200.0    | 197.7    |
| CO <sub>2</sub> compressor      | t <sub>CO<sub>2</sub></sub> /h   | 7.1       | 0.0       | 0.0      | 0.0      | 0.0       | 0.0      | 0.0      |
| CO <sub>2</sub> liquefaction    | t <sub>CO<sub>2</sub></sub> /h   | 4.4       | 0.0       | 3.2      | 0.0      | 0.6       | 12.0     | 0.5      |
| CO <sub>2</sub> (g) storage     | t <sub>CO<sub>2</sub></sub>      | 131.4     | 0.0       | 0.1      | 0.1      | 0.0       | 0.0      | 0.0      |
| CO <sub>2</sub> (l) storage     | t <sub>CO<sub>3</sub></sub>      | 2 115.2   | 0.2       | 2 977.6  | 1.3      | 872.5     | 7 520.5  | 475.7    |
| Heat pump                       | MW <sub>th</sub>                 | 260.9     | 212.7     | 155.8    | 155.4    | 247.1     | 262.1    | 187.5    |
| Electric water boiler           | MW <sub>th</sub>                 | 136.3     | 179.3     | 568.9    | 398.0    | 243.5     | 173.9    | 308.1    |
| LT (78°C) heat storage          | MWh <sub>th</sub>                | 2 769.4   | 2 639.9   | 1 724.0  | 1 940.3  | 3 133.8   | 3 369.7  | 2 325.5  |
| HT (100°C) heat storage         | MWh <sub>th</sub>                | 912.8     | 1 039.3   | 3 153.1  | 2 031.3  | 1 672.1   | 1 404.0  | 1 658.1  |
| Methanol plant                  | t <sub>MeOH</sub> /h             | 139.2     | 126.3     | 145.6    | 139.0    | 128.4     | 139.8    | 135.6    |
| MeOH storage                    | t <sub>MeOH</sub>                | 39 592.2  | 5 941.9   | 71 040.9 | 50 569.0 | 12 297.7  | 35 844.0 | 40 357.3 |

Table S7. Annual flows of Power-to-Methanol plants for a 1 Mt/a methanol supply in 2030.

| Item                            | Unit                             | CHL-PAT | AUS     | US-CA   | CHL-ATA | DEU    | FIN    | OMN     |
|---------------------------------|----------------------------------|---------|---------|---------|---------|--------|--------|---------|
| PV fixed tilted                 | GWh                              | 12.2    | 0.0     | 12866.2 | 4816.1  | 3230.0 | 499.1  | 1116.3  |
| PV single-axis tracking         | GWh                              | 0.0     | 12386.0 | 0.0     | 8146.3  | 384.7  | 3659.9 | 11750.4 |
| Wind PP                         | GWh                              | 11886.0 | 0.0     | 331.2   | 0.0     | 8482.4 | 8756.1 | 0.0     |
| H <sub>2</sub> -CCGT            | GWh                              | 0.0     | 0.0     | 0.0     | 0.0     | 0.0    | 0.0    | 0.0     |
| H <sub>2</sub> -OCGT            | GWh                              | 4.6     | 0.0     | 0.0     | 0.0     | 3.6    | 0.0    | 0.0     |
| Battery interface               | GWh <sub>in</sub>                | 0.0     | 632.2   | 326.9   | 505.1   | 44.1   | 43.7   | 553.9   |
| Battery storage                 | GWh <sub>out</sub>               | 0.0     | 588.0   | 304.0   | 469.7   | 41.0   | 40.6   | 515.1   |
| Curtailed electricity           | GWh                              | 34.4    | 489.5   | 797.8   | 576.1   | 356.1  | 1015.5 | 731.9   |
| Electrolyser                    | GWh <sub>H<sub>2</sub>,HHV</sub> | 7854.8  | 7843.0  | 7843.0  | 7843.0  | 7852.3 | 7843.0 | 7843.0  |
| Replaced stack                  | GWh <sub>H<sub>2</sub>,HHV</sub> | 3202.1  | 0.0     | 0.0     | 205.6   | 2394.1 | 2195.6 | 156.2   |
| H <sub>2</sub> compressor       | GWh <sub>H<sub>2</sub>,HHV</sub> | 1659.1  | 4509.2  | 4177.0  | 4233.9  | 2270.8 | 2191.0 | 4281.9  |
| H <sub>2</sub> salt cavern      | GWh <sub>H<sub>2</sub>,HHV</sub> | 0.0     | 4509.2  | 0.0     | 0.0     | 2270.8 | 0.0    | 0.0     |
| H <sub>2</sub> rock cavern      | GWh <sub>H<sub>2</sub>,HHV</sub> | 1547.5  | 0.0     | 0.0     | 0.0     | 0.0    | 0.0    | 0.0     |
| H <sub>2</sub> underground pipe | GWh <sub>H<sub>2</sub>,HHV</sub> | 111.6   | 0.1     | 4177.0  | 4233.9  | 0.0    | 2191.0 | 4281.9  |
| DAC                             | kt <sub>CO<sub>2</sub></sub>     | 1460.0  | 1460.0  | 1460.0  | 1460.0  | 1460.0 | 1460.0 | 1460.0  |
| CO <sub>2</sub> compressor      | kt <sub>CO<sub>2</sub></sub>     | 10.6    | 0.0     | 0.0     | 0.0     | 0.0    | 0.0    | 0.0     |
| CO <sub>2</sub> liquefaction    | kt <sub>CO<sub>2</sub></sub>     | 19.2    | 0.0     | 12.6    | 0.0     | 5.2    | 34.9   | 2.6     |
| CO <sub>2</sub> (g) storage     | kt <sub>CO<sub>2</sub></sub>     | 10.6    | 0.0     | 0.0     | 0.0     | 0.0    | 0.0    | 0.0     |
| CO <sub>2</sub> (l) storage     | kt <sub>CO<sub>2</sub></sub>     | 19.2    | 0.0     | 12.6    | 0.0     | 5.2    | 34.9   | 2.6     |
| Heat pump                       | GWh <sub>th</sub>                | 1467.0  | 1566.1  | 844.2   | 876.1   | 1658.5 | 1429.4 | 1226.3  |
| Electric water boiler           | GWh <sub>th</sub>                | 470.6   | 375.5   | 1105.2  | 1071.2  | 282.2  | 509.8  | 718.1   |
| LT (78°C) heat storage          | GWh <sub>th,in</sub>             | 1069.9  | 1142.0  | 615.7   | 639.0   | 1209.5 | 1042.6 | 894.3   |
| HT (100°C) heat storage         | GWh <sub>th,in</sub>             | 75.8    | 269.0   | 636.1   | 542.4   | 223.6  | 148.5  | 404.2   |
| Methanol plant                  | kt <sub>MeOH</sub>               | 1000.0  | 1000.0  | 1000.0  | 1000.0  | 1000.0 | 1000.0 | 1000.0  |
| Methanol storage                | kt <sub>MeOH</sub>               | 74.4    | 8.3     | 87.0    | 63.4    | 22.8   | 68.8   | 52.1    |



|                                                    |                                    |        |        |        |        |        |        |        |              |
|----------------------------------------------------|------------------------------------|--------|--------|--------|--------|--------|--------|--------|--------------|
| Lifetime                                           | year                               | 20     | 20     | 20     | 20     | 20     | 20     | 20     | 33           |
| Cycle eff.                                         | %                                  | 91     | 92     | 93     | 94     | 95     | 95     | 95     | 34           |
| Self-discharge                                     | %/h                                | 0      | 0      | 0      | 0      | 0      | 0      | 0      |              |
| <b>Battery interface (inverter, etc)</b>           |                                    |        |        |        |        |        |        |        |              |
| Capacity                                           | MW                                 | 20     | 20     | 20     | 20     | 20     | 20     | 20     | 29           |
| Capex                                              | €/kW                               | 117    | 76     | 55     | 44     | 37     | 33     | 30     | 29           |
| Opex <sub>fix</sub>                                | €/kW                               | 1.64   | 1.29   | 1.10   | 1.01   | 0.93   | 0.86   | 0.84   | 29           |
| Opex <sub>var</sub>                                | €/kWh                              | 0      | 0      | 0      | 0      | 0      | 0      | 0      |              |
| Lifetime                                           | year                               | 20     | 20     | 20     | 20     | 20     | 20     | 20     | 33           |
| <b>Combined cycle gas turbine</b>                  |                                    |        |        |        |        |        |        |        |              |
| Capacity                                           | MW                                 |        | 580    | 580    | 580    | 580    | 580    | 580    | 35           |
| Capex (conventional)                               | €/kW                               |        | 775    | 775    | 775    | 775    | 775    | 775    | 35           |
| Capex (H <sub>2</sub> -fuelled)                    | €/kW                               |        | 852.5  | 852.5  | 852.5  | 852.5  | 852.5  | 852.5  | 10% higher   |
| Opex <sub>fix</sub>                                | % of capex p.a.                    |        | 2.5    | 2.5    | 2.5    | 2.5    | 2.5    | 2.5    | 35           |
| Opex <sub>var</sub>                                | €/kWh                              |        | 0.002  | 0.002  | 0.002  | 0.002  | 0.002  | 0.002  | 35           |
| Lifetime                                           | year                               |        | 35     | 35     | 35     | 35     | 35     | 35     | 36           |
| Efficiency                                         | % - LHV                            |        | 61.2   | 61.2   | 62.3   | 63.3   | 63.3   | 63.3   | 35           |
| Efficiency                                         | % - HHV                            |        | 52.2   | 52.2   | 53.1   | 54.0   | 54.0   | 54.0   |              |
| <b>Open cycle gas turbine</b>                      |                                    |        |        |        |        |        |        |        |              |
| Capacity                                           | MW                                 |        | 250    | 250    | 250    | 250    | 250    | 250    | 35           |
| Capex (conventional)                               | €/kW                               |        | 475    | 475    | 475    | 475    | 475    | 475    | 35           |
| Capex (H <sub>2</sub> -fuelled)                    | €/kW                               |        | 522.5  | 522.5  | 522.5  | 522.5  | 522.5  | 522.5  | 10% higher   |
| Opex <sub>fix</sub>                                | % of capex p.a.                    |        | 3.0    | 3.0    | 3.0    | 3.0    | 3.0    | 3.0    | 35           |
| Opex <sub>var</sub>                                | €/kWh                              |        | 0.011  | 0.011  | 0.011  | 0.011  | 0.011  | 0.011  | 35           |
| Lifetime                                           | year                               |        | 35     | 35     | 35     | 35     | 35     | 35     | 36           |
| Efficiency                                         | % - LHV                            |        | 43.8   | 45.4   | 45.9   | 46.5   | 47.0   | 47.5   |              |
| Efficiency                                         | % - HHV                            |        | 37.4   | 38.7   | 39.2   | 39.6   | 40.1   | 40.5   | 35           |
| <b>Alkaline water electrolyser</b>                 |                                    |        |        |        |        |        |        |        | 37–39 and LR |
| Capacity                                           | MW                                 | 250    | 250    | 250    | 250    | 250    | 250    | 250    |              |
| Capex (BCS)                                        | €/kW <sub>el</sub>                 | 600    | 446    | 316    | 234    | 189    | 163    | 148    |              |
|                                                    | €/kW <sub>H<sub>2</sub>,HHV</sub>  | 818    | 597    | 415    | 301    | 239    | 202    | 180    |              |
| Capex (HCS)                                        | €/kW <sub>el</sub>                 | 792    | 659    | 495    | 373    | 303    | 261    | 238    |              |
|                                                    | €/kW <sub>H<sub>2</sub>,HHV</sub>  | 1080   | 882    | 649    | 480    | 383    | 324    | 290    |              |
| Opex <sub>fix</sub>                                | % of capex p.a.                    | 3.5    | 3.5    | 3.5    | 3.5    | 3.5    | 3.5    | 3.5    |              |
| Opex <sub>var</sub> – excl. stack replacement cost | €/kWh <sub>H<sub>2</sub>,HHV</sub> | 0.0002 | 0.0002 | 0.0002 | 0.0002 | 0.0002 | 0.0002 | 0.0002 |              |
| Opex <sub>var</sub> – stack replacement cost (BCS) | €/kWh <sub>H<sub>2</sub>,HHV</sub> | 0.0019 | 0.0014 | 0.0011 | 0.0009 | 0.0009 | 0.0009 | 0.0009 |              |















Table S9. Technical specifications of applied storage technologies.

| Storage                         | Energy to Power<br>Ratio - charge | Energy to Power<br>Ratio - discharge | maximum<br>hourly charge | maximum hourly<br>discharge | Cycle<br>eff. | Charging<br>eff. | Discharging<br>eff. | Self-discharge |
|---------------------------------|-----------------------------------|--------------------------------------|--------------------------|-----------------------------|---------------|------------------|---------------------|----------------|
|                                 | h                                 | h                                    | %/h                      | %/h                         | %             | %                | %                   | %/hour         |
| Battery 2020                    | 1                                 | 1                                    | 100.00%                  | 100.00%                     | 91%           | 95.4%            | 95.4%               | 0.000%         |
| Battery 2030                    | 1                                 | 1                                    | 100.00%                  | 100.00%                     | 93%           | 96.4%            | 96.4%               | 0.000%         |
| Battery 2040                    | 1                                 | 1                                    | 100.00%                  | 100.00%                     | 95%           | 97.5%            | 97.5%               | 0.000%         |
| Battery 2050                    | 1                                 | 1                                    | 100.00%                  | 100.00%                     | 95%           | 97.5%            | 97.5%               | 0.000%         |
| H <sub>2</sub> salt cavern      | 240                               | 240                                  | 0.42%                    | 0.42%                       | 100%          | 100.0%           | 100.0%              | 0.000%         |
| H <sub>2</sub> rock cavern      | 240                               | 240                                  | 0.42%                    | 0.42%                       | 100%          | 100.0%           | 100.0%              | 0.000%         |
| H <sub>2</sub> underground pipe | 6                                 | 6                                    | 16.67%                   | 16.67%                      | 100%          | 100.0%           | 100.0%              | 0.000%         |
| CO <sub>2</sub> gaseous storage | 6                                 | 6                                    | 16.67%                   | 16.67%                      | 100%          | 100.0%           | 100.0%              | 0.000%         |
| CO <sub>2</sub> liquid storage  | 6                                 | 6                                    | 16.67%                   | 16.67%                      | 100%          | 100.0%           | 100.0%              | 0.000%         |
| LT heat storage (warm water)    | 7                                 | 7                                    | 14.29%                   | 14.29%                      | 98%           | 99.0%            | 99.0%               | 0.005%         |
| HT heat storage (hot water)     | 7                                 | 7                                    | 14.29%                   | 14.29%                      | 98%           | 99.0%            | 99.0%               | 0.005%         |
| MeOH Storage                    | 168                               | 168                                  | 0.60%                    | 0.60%                       | 100%          | 100.0%           | 100.0%              | 0.000%         |

## References

- 1 A. Aghahosseini and C. Breyer, *Energy Convers Manag*, 2018, **169**, 161–173.
- 2 M. Fasihi, R. Weiss, J. Savolainen and C. Breyer, *Appl Energy*, 2021, **294**, 116170.
- 3 R. Nayak-Luke, R. Bañares-Alcántara and I. Wilkinson, *Ind Eng Chem Res*, 2018, **57**, 14607–14616.
- 4 N. Gray, S. McDonagh, R. O’Shea, B. Smyth and J. D. Murphy, *Advances in Applied Energy*, 2021, **1**, 100008.
- 5 H. Kobayashi, A. Hayakawa, K. D. K. A. Somarathne and E. C. Okafor, *Proceedings of the Combustion Institute*, 2019, **37**, 109–133.
- 6 T. Galimova, M. Ram, D. Bogdanov, M. Fasihi, S. Khalili, A. Gulagi, H. Karjunen, T. N. O. Mensah and C. Breyer, *J Clean Prod*, 2022, **373**, 133920.
- 7 E. R. Morgan, PhD dissertation, University of Massachusetts Amherst, 2013.
- 8 D. Frattini, G. Cinti, G. Bidini, U. Desideri, R. Cioffi and E. Jannelli, *Renew Energy*, 2016, **99**, 472–482.
- 9 M. Junginger and A. Louwen, *Technological learning in the transition to a low-carbon energy system: Conceptual issues, empirical findings, and use in energy modeling*, Academic Press, London, 1st Edition., 2019.
- 10 O. Schmidt, A. Gambhir, I. Staffell, A. Hawkes, J. Nelson and S. Few, *Int J Hydrogen Energy*, 2017, **42**, 30470–30492.
- 11 K. Schoots, F. Ferioli, G. J. Kramer and B. C. C. van der Zwaan, *Int J Hydrogen Energy*, 2008, **33**, 2630–2645.
- 12 H. H. Rogner, *Int J Hydrogen Energy*, 1998, **23**, 833–840.
- 13 D. Bogdanov, M. Ram, A. Aghahosseini, A. Gulagi, A. S. Oyewo, M. Child, U. Caldera, K. Sadovskaia, J. Farfan, L. De Souza Noel Simas Barbosa, M. Fasihi, S. Khalili, T. Traber and C. Breyer, *Energy*, 2021, **227**, 120467.
- 14 T. Galimova, M. Ram, D. Bogdanov, M. Fasihi, A. Gulagi, S. Khalili and C. Breyer, *Renewable and Sustainable Energy Reviews*, 2023, **183**, 113420.
- 15 Climeworks, *Climeworks DACS factsheet for researchers*, Zürich, 2019.
- 16 C. Beuttler, L. Charles and J. Wurzbacher, *Frontiers in Climate*, 2019, **1**, 10.
- 17 Climeworks, Articles and FAQ about direct air capture. How much energy is required to run Climeworks’ direct air capture process?, <https://web.archive.org/web/20210927092014/https://climeworks.com/faq-about-direct-air-capture>, (accessed 1 November 2021).
- 18 S. Deutz and A. Bardow, *Nat Energy*, 2021, **6**, 203–213.
- 19 J. Wurzbacher and C. Gebald, *Climeworks 4th Direct Air Capture Summit*, 2023.

- 20 National Academies of Sciences Engineering and Medicine, *Negative Emissions Technologies and Reliable Sequestration: A Research Agenda*, The National Academies Press, Washington, D.C., 2019.
- 21 F. Sabatino, A. Grimm, F. Gallucci, M. van Sint Annaland, G. J. Kramer and M. Gazzani, *Joule*, 2021, **5**, 2047–2076.
- 22 M. Sendi, M. Bui, N. Mac Dowell and P. Fennell, *One Earth*, 2022, **5**, 1153–1164.
- 23 J. F. Wiegner, A. Grimm, L. Weimann and M. Gazzani, *Ind Eng Chem Res*, 2022, **61**, 12649–12667.
- 24 Bloomberg, World’s Largest Carbon-Sucking Plant Starts Making Tiny Dent in Emissions, <https://www.bloomberg.com/news/features/2021-09-08/inside-the-world-s-largest-direct-carbon-capture-plant>, (accessed 1 November 2023).
- 25 IEA, CCUS Projects Database, <https://www.iea.org/data-and-statistics/data-product/ccus-projects-database>, (accessed 1 November 2023).
- 26 M. Fasihi, O. Efimova and C. Breyer, *J Clean Prod*, 2019, **224**, 957–980.
- 27 J. Young, N. McQueen, C. Charalambous, S. Foteinis, O. Hawrot, M. Ojeda, H. Pilorgé, J. Andresen, P. Psarras, P. Renforth, S. Garcia and M. van der Spek, *One Earth*, 2023, **6**, 899–917.
- 28 ETIP-PV, *The true competitiveness of solar PV. A European case study*, Munich., 2017.
- 29 E. Vartiainen, G. Masson, C. Breyer, D. Moser and E. Román Medina, *Progress in Photovoltaics: Research and Applications*, 2020, **28**, 439–453.
- 30 M. Bolinger and G. Bolinger, *IEEE J Photovolt*, 2022, **12**, 589–594.
- 31 D. Bogdanov, J. Farfan, K. Sadovskaia, A. Aghahosseini, M. Child, A. Gulagi, A. S. Oyewo, L. de Souza Noel Simas Barbosa and C. Breyer, *Nat Commun*, 2019, **10**, 1077.
- 32 M. Bolinger, J. Seel and K. Hamachi LaCommare, *Utility-Scale Solar 2016: An Empirical Analysis of Project Cost, Performance, and Pricing Trends in the United States*, Lawrence Berkeley National Laboratory, Berkley, 2017.
- 33 L. Neij, *Energy Policy*, 2008, **36**, 2200–2211.
- 34 C. Breyer, D. Bogdanov, A. Aghahosseini, A. Gulagi, M. Child, A. S. Oyewo, J. Farfan, K. Sadovskaia and P. Vainikka, *Progress in Photovoltaics: Research and Applications*, 2018, **26**, 505–523.
- 35 [EC] - European Commission, *ETRI 2014: Energy Technology Reference Indicator projections for 2010-2050; Joint Research Centre (JRC), European Commission (EC).*, Luxembourg, 2014.
- 36 J. Farfan and C. Breyer, *J Clean Prod*, 2017, **141**, 370–384.
- 37 Sweco Finland Holding Oy, *Cost Estimates for Green Field Power to Food Plant Utilities and Storage Systems - internal report for Solar Foods Oy*, 2019.
- 38 Confidential, *Confidential budget quote from a European electrolyser supplier*, 2020.
- 39 IEA, *Report prepared by the IEA for the G20, Japan*.

- 40 D. D. Papadias and R. K. Ahluwalia, *Int J Hydrogen Energy*, 2021, **46**, 34527–34541.
- 41 G. Towler and R. Sinnott, *Chemical Engineering Design: Principles, Practice and Economics of Plant and Process Design*, Butterworth-Heinemann, Oxford, 3rd Edition., 2021.
- 42 DNV KEMA, *Systems Analyses Power to Gas a Technology Review | Energy Storage | Wind Power | Free 30-day Trial | Scribd*, Groningen, 2013.
- 43 J. Michalski, U. Bünger, F. Crotogino, S. Donadei, G.-S. Schneider, T. Pregger, K.-K. Cao and D. Heide, *Int J Hydrogen Energy*, 2017, **42**, 13427–13443.
- 44 M. Fasihi and C. Breyer, *J Clean Prod*, 2020, **243**, 118466.
- 45 F. Crotogino, S. Donadei, U. Bünger and H. Landinger, *18th World Hydrogen Energy Conference 2010 - WHEC 2010 Parallel Sessions Book 4: Storage Systems / Policy Perspectives, Initiatives and Co-operations*.
- 46 HyUnder, *Assessment of the potential, the actors and relevant business cases for large scale and seasonal storage of renewable electricity by hydrogen underground storage in Europe - Overview on all Known Underground Storage Technologies for Hydrogen*, Huesca, 2013.
- 47 Carbon Recycling International, The Shunli CO<sub>2</sub> -To-Methanol Plant: Commercial Scale Production in China, <https://www.carbonrecycling.is/projects-shunli>, (accessed 9 June 2023).
- 48 M. Pérez-Fortes, J. C. Schöneberger, A. Boulamanti and E. Tzimas, *Appl Energy*, 2016, **161**, 718–732.
- 49 K. D. Timmerhaus, M. S. Peters and R. E. West, *Plant Design and Economics for Chemical Engineers Fifth Edition*, 2004.
- 50 Aspen Technology, *Aspen Plus*, Aspen Technology, Inc., Bedford, Massachusetts, 2024.
- 51 Danish Energy Agency and Energinet, *Technology Data - Energy Plants for Electricity and District heating generation*, Copenhagen, 2016.
- 52 Danish Energy Agency, *Technology Data for Industrial Process Heat - Version 1*, Copenhagen, 2020.
- 53 A. C. Christidis, PhD Dissertation, Technical University of Berlin, 2019.
- 54 A. Kraft, *EEB ENERKO Energiewirtschaftliche Beratung GmbH*, 2020.
